# Supplementary material for: Density-dependent condition of juvenile penaeid shrimps in seagrass-dominated aquatic vegetation beds located at different distance from a tidal inlet
Source: PeerJ. 2020 Dec 8;8:e10496. doi: 10.7717/peerj.10496 (PMC7731651; doi:10.7717/peerj.10496)
Supplement: Supplemental Information 1 — Environmental conditions (salinity, temperature, and dissolved oxygen) and biomass of submerged aquatic vegetation (seagrass, macroalgae, and total): monthly data from each seagrass bed for 12 months. [file peerj-08-10496-s001.xlsx]

## Sheet: Environmental data
				Total submerged			Dissolved
		Macroalgae	Seagrasses	aquatic vegetation		Temperature	oxygen
Month (2005)	Seagrass bed	biomass (g/m2 ww)	biomass (g/m2 ww)	biomass (g/m2 ww)	Salinity	(°C)	(mg/L)
January	Distant	36.7917	10.7417	47.5333	44.3333	17.2667	5.71
February	Distant	6.14167	61.25	67.3917	44	23.6333	5.49
March	Distant	251.983	109.333	361.317	39.6667	21.9	4.88667
April	Distant	261.168	202.567	463.734	40	25.6333	4.47333
May	Distant	85.2	145.258	230.458	41.3333	26.8	3.49333
June	Distant	90.5917	448.1	538.692	44.6667	29.4333	3.18667
July	Distant	141.425	363.275	504.7	45	29.7333	2.44667
August	Distant	229.117	600.667	829.783	41.6667	28.5667	3.21667
September	Distant	261.058	931.033	1192.09	40	29.6333	3.41667
October	Distant	273.308	359.75	633.058	43	30.0667	3.51
November	Distant	120.925	303.858	424.783	32	16.6333	5.18
December	Distant	457.075	193.892	650.967	32	19.5667	5.54
January	Nearby	312.542	54.2083	366.75	38.5	20.8	6.3
February	Nearby	7.89167	117	124.892	38.6667	20.1667	5.73667
March	Nearby	275.45	320.075	595.525	31	20.8667	4.69333
April	Nearby	118.525	397.7	516.225	39	27.0667	4.86
May	Nearby	54.9083	582.167	637.075	37.6667	26.0333	3.77667
June	Nearby	37.5833	1300.7	1338.28	39.3333	28.6667	3.70667
July	Nearby	53.59	631.175	684.765	40.6667	30.2	4.05667
August	Nearby	18.85	494.817	513.667	38.6667	29.0333	3.59
September	Nearby	83.9083	261.35	345.258	36.3333	29.9333	4.35
October	Nearby	30.3333	201.975	232.308	38.3333	29.9667	3.87333
November	Nearby	5.61667	564.75	570.367	34.6667	19.8667	4.78333
December	Nearby	17.0917	270.95	288.042	36.3333	20.7667	5.61333
ww: wet weight

## Sheet: Student's t-tests
t-tests; Grouping: Group 1: Distant, Group 2: Nearby
	Mean (Distant)	Mean (Nearby)	t-value	df	p	Valid N (Distant)	Valid N (Nearby)	Std.Dev. (Distant)	Std.Dev. (Nearby)
Salinity	40.6389	37.4306	2.15953	22	0.041976	12	12	4.4551	2.5766
Temperature	24.9056	25.2806	-0.19488	22	0.847275	12	12	5.0114	4.3953
Dissolved oxygen	4.2125	4.6117	-0.96468	22	0.345192	12	12	1.1242	0.8893
Seagrasses	310.81	433.072	-1.00838	22	0.324237	12	12	259.097	330.57
Macroalgae	184.565	84.6908	2.10835	22	0.046618	12	12	127.448	103.368
Total submerged aquatic vegetation	495.376	517.763	-0.17398	22	0.863472	12	12	319.124	311.212
