# Supplementary material for: Density-dependent condition of juvenile penaeid shrimps in seagrass-dominated aquatic vegetation beds located at different distance from a tidal inlet
Source: PeerJ. 2020 Dec 8;8:e10496. doi: 10.7717/peerj.10496 (PMC7731651; doi:10.7717/peerj.10496)
Supplement: Supplemental Information 2 — Carapace length (mm) of all shrimp caught in each seagrass bed. Shrimp abundance (total and species specific) collected monthly within each seagrass bed for the 12 months is reported. All replicates are included. [file peerj-08-10496-s002.xlsx]

## Sheet: Carapace length of shrimps
Shrimp carapace length (CL) of all penaeids caught in each seagrass bed
Distant seagrass bed	Nearby seagrass bed
CL (mm)	CL (mm)
2.9	1.5
4	3.3
4.4	3.3
4.5	3.8
4.9	3.9
5	4
5.2	4
5.3	4
5.4	4
5.4	4.5
5.5	4.7
5.5	4.9
5.5	4.9
5.6	4.9
5.6	4.9
5.6	4.9
5.7	4.9
5.7	4.9
5.7	5
5.7	5
5.8	5
5.9	5
5.9	5
5.9	5
5.9	5
6	5
6	5
6	5
6	5
6	5
6	5.1
6	5.1
6	5.1
6.1	5.1
6.1	5.1
6.1	5.1
6.1	5.1
6.1	5.1
6.1	5.1
6.1	5.1
6.2	5.1
6.2	5.1
6.2	5.1
6.2	5.2
6.2	5.2
6.3	5.3
6.3	5.3
6.3	5.4
6.3	5.4
6.3	5.4
6.3	5.5
6.3	5.5
6.3	5.5
6.3	5.5
6.3	5.5
6.3	5.5
6.3	5.5
6.4	5.5
6.4	5.6
6.4	5.6
6.4	5.6
6.4	5.6
6.4	5.6
6.4	5.6
6.4	5.7
6.4	5.7
6.4	5.7
6.4	5.7
6.5	5.7
6.5	5.8
6.5	5.8
6.5	5.8
6.5	5.8
6.6	5.8
6.6	5.8
6.6	5.9
6.6	5.9
6.6	5.9
6.6	5.9
6.6	5.9
6.6	5.9
6.6	5.9
6.6	5.9
6.6	5.9
6.7	5.9
6.7	5.9
6.7	5.9
6.7	5.9
6.7	5.9
6.7	5.9
6.7	5.9
6.7	5.9
6.7	5.9
6.8	6
6.8	6
6.8	6
6.8	6
6.8	6
6.8	6
6.8	6
6.9	6
6.9	6
6.9	6
6.9	6
6.9	6
6.9	6
6.9	6
6.9	6
6.9	6
7	6
7	6
7	6
7	6
7	6.1
7	6.1
7	6.1
7	6.1
7	6.1
7	6.1
7.1	6.1
7.1	6.1
7.1	6.1
7.1	6.1
7.1	6.1
7.1	6.1
7.1	6.1
7.1	6.1
7.1	6.1
7.1	6.1
7.1	6.1
7.1	6.1
7.1	6.1
7.2	6.1
7.2	6.2
7.2	6.2
7.2	6.2
7.2	6.2
7.2	6.2
7.2	6.2
7.2	6.2
7.3	6.2
7.3	6.2
7.3	6.2
7.3	6.2
7.3	6.2
7.3	6.2
7.3	6.2
7.4	6.2
7.4	6.3
7.4	6.3
7.4	6.3
7.4	6.3
7.4	6.3
7.4	6.3
7.4	6.3
7.4	6.3
7.4	6.3
7.4	6.3
7.4	6.3
7.4	6.3
7.4	6.3
7.4	6.4
7.4	6.4
7.4	6.4
7.5	6.4
7.5	6.4
7.5	6.4
7.5	6.4
7.5	6.4
7.5	6.4
7.5	6.4
7.5	6.4
7.5	6.4
7.5	6.4
7.5	6.4
7.5	6.4
7.5	6.4
7.6	6.4
7.6	6.4
7.6	6.4
7.6	6.5
7.6	6.5
7.6	6.5
7.6	6.5
7.6	6.5
7.6	6.5
7.6	6.5
7.6	6.5
7.6	6.5
7.6	6.5
7.6	6.5
7.6	6.5
7.6	6.5
7.7	6.5
7.7	6.5
7.7	6.5
7.7	6.6
7.7	6.6
7.7	6.6
7.7	6.6
7.7	6.6
7.7	6.6
7.7	6.6
7.7	6.6
7.7	6.6
7.7	6.6
7.7	6.6
7.8	6.6
7.8	6.6
7.8	6.6
7.8	6.6
7.8	6.6
7.8	6.6
7.9	6.6
7.9	6.6
7.9	6.6
7.9	6.6
7.9	6.6
7.9	6.7
7.9	6.7
7.9	6.7
8	6.7
8	6.7
8	6.7
8	6.7
8	6.7
8	6.7
8	6.7
8	6.7
8	6.7
8	6.7
8	6.7
8	6.7
8	6.7
8	6.7
8	6.7
8	6.8
8	6.8
8	6.8
8	6.8
8	6.8
8	6.8
8	6.8
8	6.8
8	6.8
8.1	6.8
8.1	6.8
8.1	6.8
8.1	6.8
8.1	6.8
8.1	6.8
8.1	6.8
8.1	6.8
8.1	6.8
8.1	6.8
8.1	6.8
8.1	6.8
8.1	6.8
8.1	6.8
8.1	6.8
8.1	6.8
8.1	6.8
8.1	6.8
8.1	6.8
8.1	6.9
8.1	6.9
8.1	6.9
8.1	6.9
8.2	6.9
8.2	6.9
8.2	6.9
8.2	6.9
8.2	6.9
8.2	6.9
8.2	6.9
8.2	6.9
8.2	6.9
8.2	6.9
8.2	6.9
8.2	6.9
8.2	6.9
8.2	6.9
8.2	6.9
8.2	6.9
8.3	6.9
8.3	6.9
8.3	6.9
8.3	6.9
8.3	6.9
8.3	6.9
8.3	6.9
8.3	6.9
8.3	6.9
8.3	6.9
8.3	6.9
8.3	6.9
8.3	6.9
8.3	6.9
8.3	7
8.3	7
8.3	7
8.3	7
8.3	7
8.3	7
8.4	7
8.4	7
8.4	7
8.4	7
8.4	7
8.4	7
8.4	7
8.4	7
8.4	7
8.4	7
8.4	7
8.4	7
8.4	7
8.4	7
8.4	7
8.5	7
8.5	7
8.5	7
8.5	7
8.5	7
8.5	7
8.5	7
8.5	7
8.5	7
8.5	7
8.5	7
8.5	7
8.5	7
8.5	7
8.5	7
8.5	7.1
8.5	7.1
8.5	7.1
8.6	7.1
8.6	7.1
8.6	7.1
8.6	7.1
8.6	7.1
8.6	7.1
8.6	7.1
8.6	7.1
8.6	7.1
8.6	7.1
8.6	7.1
8.6	7.1
8.6	7.1
8.6	7.1
8.6	7.1
8.6	7.1
8.6	7.1
8.6	7.1
8.6	7.1
8.6	7.1
8.6	7.1
8.6	7.1
8.6	7.1
8.6	7.2
8.6	7.2
8.7	7.2
8.7	7.2
8.7	7.2
8.7	7.2
8.7	7.2
8.7	7.2
8.7	7.2
8.7	7.2
8.7	7.2
8.7	7.2
8.7	7.2
8.7	7.2
8.7	7.2
8.7	7.2
8.7	7.2
8.7	7.2
8.7	7.2
8.8	7.2
8.8	7.2
8.8	7.2
8.8	7.2
8.8	7.2
8.8	7.2
8.8	7.2
8.8	7.2
8.8	7.3
8.8	7.3
8.8	7.3
8.8	7.3
8.8	7.3
8.8	7.3
8.8	7.3
8.8	7.3
8.8	7.3
8.8	7.3
8.8	7.3
8.8	7.3
8.8	7.3
8.8	7.3
8.8	7.3
8.9	7.3
8.9	7.3
8.9	7.3
8.9	7.3
8.9	7.3
8.9	7.3
8.9	7.3
8.9	7.3
8.9	7.3
8.9	7.3
8.9	7.3
8.9	7.3
8.9	7.3
8.9	7.3
8.9	7.3
8.9	7.4
8.9	7.4
8.9	7.4
8.9	7.4
8.9	7.4
8.9	7.4
8.9	7.4
8.9	7.4
8.9	7.4
8.9	7.4
8.9	7.4
9	7.4
9	7.4
9	7.4
9	7.4
9	7.4
9	7.4
9	7.4
9	7.4
9	7.4
9	7.4
9.1	7.4
9.1	7.4
9.1	7.4
9.1	7.4
9.1	7.4
9.1	7.4
9.1	7.4
9.1	7.4
9.1	7.4
9.1	7.5
9.1	7.5
9.1	7.5
9.1	7.5
9.2	7.5
9.2	7.5
9.2	7.5
9.2	7.5
9.2	7.5
9.2	7.5
9.2	7.5
9.2	7.5
9.2	7.5
9.2	7.5
9.2	7.5
9.2	7.6
9.2	7.6
9.2	7.6
9.2	7.6
9.2	7.6
9.2	7.6
9.2	7.6
9.2	7.6
9.3	7.6
9.3	7.6
9.3	7.6
9.3	7.6
9.3	7.6
9.3	7.6
9.3	7.6
9.3	7.6
9.3	7.6
9.3	7.6
9.3	7.6
9.3	7.6
9.3	7.6
9.3	7.6
9.3	7.6
9.3	7.6
9.3	7.6
9.3	7.6
9.3	7.6
9.3	7.6
9.3	7.6
9.3	7.6
9.3	7.6
9.3	7.6
9.3	7.6
9.3	7.6
9.3	7.6
9.3	7.6
9.4	7.6
9.4	7.6
9.4	7.6
9.4	7.6
9.4	7.6
9.4	7.6
9.4	7.6
9.4	7.6
9.4	7.6
9.4	7.6
9.4	7.6
9.4	7.6
9.4	7.6
9.4	7.7
9.4	7.7
9.4	7.7
9.4	7.7
9.4	7.7
9.4	7.7
9.4	7.7
9.4	7.7
9.4	7.7
9.4	7.7
9.5	7.7
9.5	7.7
9.5	7.7
9.5	7.7
9.5	7.7
9.5	7.7
9.5	7.7
9.5	7.7
9.5	7.7
9.5	7.7
9.5	7.7
9.5	7.7
9.5	7.7
9.5	7.7
9.5	7.7
9.5	7.7
9.5	7.7
9.5	7.7
9.5	7.7
9.5	7.7
9.6	7.7
9.6	7.7
9.6	7.7
9.6	7.7
9.6	7.7
9.6	7.7
9.6	7.7
9.6	7.7
9.6	7.7
9.6	7.7
9.6	7.7
9.6	7.7
9.6	7.7
9.6	7.7
9.6	7.7
9.6	7.7
9.6	7.7
9.6	7.7
9.6	7.7
9.7	7.8
9.7	7.8
9.7	7.8
9.7	7.8
9.7	7.8
9.7	7.8
9.7	7.8
9.7	7.8
9.7	7.8
9.7	7.8
9.7	7.8
9.7	7.8
9.7	7.8
9.7	7.8
9.7	7.8
9.7	7.8
9.7	7.8
9.7	7.8
9.8	7.8
9.8	7.8
9.8	7.8
9.8	7.8
9.8	7.8
9.8	7.8
9.8	7.8
9.8	7.8
9.8	7.8
9.8	7.8
9.8	7.8
9.8	7.8
9.8	7.8
9.8	7.8
9.8	7.8
9.8	7.8
9.8	7.8
9.8	7.8
9.8	7.8
9.9	7.8
9.9	7.8
9.9	7.8
9.9	7.8
9.9	7.8
9.9	7.8
9.9	7.8
9.9	7.8
9.9	7.8
9.9	7.9
9.9	7.9
9.9	7.9
9.9	7.9
9.9	7.9
9.9	7.9
9.9	7.9
9.9	7.9
9.9	7.9
9.9	7.9
9.9	7.9
9.9	7.9
10	7.9
10	7.9
10	7.9
10	7.9
10	7.9
10	7.9
10	7.9
10	7.9
10	7.9
10	7.9
10	7.9
10	7.9
10	7.9
10	7.9
10	7.9
10.1	7.9
10.1	7.9
10.1	7.9
10.1	8
10.1	8
10.1	8
10.1	8
10.1	8
10.1	8
10.1	8
10.1	8
10.1	8
10.1	8
10.2	8
10.2	8
10.2	8
10.2	8
10.2	8
10.2	8
10.2	8
10.2	8
10.2	8
10.2	8
10.2	8
10.2	8
10.2	8
10.2	8
10.2	8
10.2	8
10.2	8
10.2	8
10.2	8
10.2	8
10.3	8
10.3	8
10.3	8
10.3	8
10.3	8
10.3	8
10.3	8
10.3	8
10.3	8
10.3	8
10.3	8
10.3	8
10.3	8
10.3	8
10.3	8
10.3	8
10.3	8
10.3	8
10.3	8
10.3	8
10.4	8
10.4	8.1
10.4	8.1
10.4	8.1
10.4	8.1
10.4	8.1
10.4	8.1
10.4	8.1
10.4	8.1
10.4	8.1
10.4	8.1
10.4	8.1
10.4	8.1
10.4	8.1
10.4	8.1
10.4	8.1
10.4	8.1
10.4	8.1
10.4	8.1
10.4	8.1
10.4	8.1
10.4	8.1
10.4	8.1
10.5	8.1
10.5	8.1
10.5	8.1
10.5	8.1
10.5	8.1
10.5	8.1
10.5	8.1
10.5	8.1
10.5	8.1
10.6	8.1
10.6	8.1
10.6	8.1
10.6	8.1
10.6	8.1
10.6	8.1
10.6	8.1
10.6	8.1
10.6	8.1
10.6	8.1
10.6	8.1
10.6	8.2
10.6	8.2
10.7	8.2
10.7	8.2
10.7	8.2
10.7	8.2
10.7	8.2
10.7	8.2
10.7	8.2
10.7	8.2
10.7	8.2
10.7	8.2
10.7	8.2
10.7	8.2
10.7	8.2
10.7	8.2
10.7	8.2
10.7	8.2
10.8	8.2
10.8	8.2
10.8	8.2
10.8	8.2
10.8	8.2
10.8	8.2
10.8	8.2
10.8	8.2
10.8	8.2
10.8	8.2
10.8	8.2
10.8	8.2
10.8	8.2
10.8	8.2
10.8	8.2
10.8	8.2
10.8	8.2
10.8	8.2
10.9	8.2
10.9	8.2
10.9	8.2
10.9	8.2
10.9	8.2
10.9	8.2
10.9	8.2
10.9	8.3
10.9	8.3
10.9	8.3
10.9	8.3
10.9	8.3
10.9	8.3
10.9	8.3
10.9	8.3
10.9	8.3
10.9	8.3
10.9	8.3
10.9	8.3
10.9	8.3
11	8.3
11	8.3
11	8.3
11	8.3
11	8.3
11	8.3
11	8.3
11	8.3
11	8.3
11	8.3
11	8.3
11.1	8.3
11.1	8.3
11.1	8.3
11.1	8.3
11.1	8.3
11.1	8.3
11.1	8.3
11.1	8.3
11.1	8.3
11.1	8.3
11.1	8.3
11.1	8.3
11.1	8.3
11.1	8.3
11.1	8.3
11.1	8.3
11.1	8.3
11.1	8.3
11.1	8.3
11.1	8.3
11.2	8.3
11.2	8.3
11.2	8.3
11.2	8.3
11.2	8.3
11.2	8.4
11.2	8.4
11.2	8.4
11.2	8.4
11.2	8.4
11.2	8.4
11.2	8.4
11.2	8.4
11.2	8.4
11.3	8.4
11.3	8.4
11.3	8.4
11.3	8.4
11.3	8.4
11.3	8.4
11.3	8.4
11.3	8.4
11.3	8.4
11.3	8.4
11.3	8.4
11.3	8.4
11.3	8.4
11.3	8.4
11.3	8.4
11.4	8.4
11.4	8.4
11.4	8.4
11.4	8.4
11.4	8.4
11.4	8.4
11.4	8.4
11.4	8.5
11.4	8.5
11.4	8.5
11.5	8.5
11.5	8.5
11.5	8.5
11.5	8.5
11.5	8.5
11.5	8.5
11.5	8.5
11.5	8.5
11.5	8.5
11.5	8.5
11.5	8.5
11.5	8.5
11.5	8.5
11.6	8.5
11.6	8.5
11.6	8.5
11.6	8.5
11.6	8.5
11.6	8.5
11.6	8.5
11.6	8.5
11.6	8.5
11.6	8.5
11.6	8.5
11.6	8.5
11.6	8.5
11.6	8.5
11.6	8.5
11.6	8.5
11.6	8.5
11.7	8.5
11.7	8.5
11.7	8.5
11.7	8.5
11.7	8.5
11.7	8.5
11.7	8.5
11.7	8.5
11.7	8.5
11.7	8.5
11.7	8.5
11.7	8.5
11.7	8.5
11.7	8.6
11.7	8.6
11.7	8.6
11.7	8.6
11.7	8.6
11.7	8.6
11.7	8.6
11.7	8.6
11.7	8.6
11.8	8.6
11.8	8.6
11.8	8.6
11.8	8.6
11.8	8.6
11.8	8.6
11.8	8.6
11.8	8.6
11.8	8.6
11.8	8.6
11.8	8.6
11.8	8.6
11.8	8.6
11.8	8.6
11.8	8.6
11.8	8.6
11.8	8.6
11.8	8.6
11.8	8.6
11.8	8.6
11.8	8.6
11.9	8.6
11.9	8.6
11.9	8.6
11.9	8.6
11.9	8.6
11.9	8.6
11.9	8.6
11.9	8.6
11.9	8.6
11.9	8.6
11.9	8.6
11.9	8.6
11.9	8.6
11.9	8.6
11.9	8.6
11.9	8.6
11.9	8.6
11.9	8.6
11.9	8.6
12	8.6
12	8.6
12	8.6
12	8.6
12	8.6
12	8.6
12	8.6
12	8.6
12	8.6
12	8.6
12	8.6
12	8.7
12	8.7
12	8.7
12	8.7
12	8.7
12	8.7
12	8.7
12.1	8.7
12.1	8.7
12.1	8.7
12.1	8.7
12.1	8.7
12.1	8.7
12.1	8.7
12.1	8.7
12.1	8.7
12.1	8.7
12.1	8.7
12.1	8.7
12.1	8.7
12.1	8.7
12.1	8.7
12.1	8.7
12.1	8.7
12.1	8.7
12.2	8.7
12.2	8.7
12.2	8.7
12.2	8.7
12.2	8.7
12.2	8.7
12.2	8.7
12.2	8.7
12.2	8.7
12.2	8.7
12.2	8.7
12.2	8.7
12.3	8.8
12.3	8.8
12.3	8.8
12.3	8.8
12.3	8.8
12.3	8.8
12.3	8.8
12.3	8.8
12.3	8.8
12.3	8.8
12.3	8.8
12.3	8.8
12.3	8.8
12.3	8.8
12.3	8.8
12.3	8.8
12.4	8.8
12.4	8.8
12.4	8.8
12.4	8.8
12.4	8.8
12.4	8.8
12.4	8.8
12.4	8.8
12.4	8.8
12.4	8.8
12.4	8.8
12.4	8.8
12.4	8.8
12.5	8.8
12.5	8.8
12.5	8.8
12.5	8.8
12.5	8.8
12.5	8.8
12.5	8.8
12.5	8.8
12.5	8.8
12.5	8.8
12.5	8.8
12.5	8.8
12.5	8.9
12.5	8.9
12.5	8.9
12.6	8.9
12.6	8.9
12.6	8.9
12.6	8.9
12.6	8.9
12.6	8.9
12.6	8.9
12.6	8.9
12.6	8.9
12.6	8.9
12.6	8.9
12.7	8.9
12.7	8.9
12.7	8.9
12.7	8.9
12.7	8.9
12.7	8.9
12.7	8.9
12.7	8.9
12.7	8.9
12.7	8.9
12.7	8.9
12.7	8.9
12.7	8.9
12.7	8.9
12.7	8.9
12.8	8.9
12.8	8.9
12.8	8.9
12.8	8.9
12.8	8.9
12.8	8.9
12.8	8.9
12.8	8.9
12.8	8.9
12.8	8.9
12.8	8.9
12.8	8.9
12.8	8.9
12.8	8.9
12.8	8.9
12.9	8.9
12.9	8.9
12.9	8.9
12.9	8.9
12.9	8.9
12.9	9
12.9	9
12.9	9
12.9	9
13	9
13	9
13	9
13	9
13	9
13	9
13	9
13	9
13	9
13	9
13	9
13	9
13	9
13	9
13	9
13	9
13	9
13.1	9
13.1	9
13.1	9
13.1	9
13.1	9
13.1	9
13.1	9
13.1	9
13.1	9
13.1	9
13.1	9
13.1	9
13.1	9
13.1	9
13.2	9
13.2	9
13.2	9
13.2	9
13.2	9
13.2	9
13.2	9.1
13.2	9.1
13.2	9.1
13.2	9.1
13.2	9.1
13.2	9.1
13.2	9.1
13.2	9.1
13.2	9.1
13.2	9.1
13.3	9.1
13.3	9.1
13.3	9.1
13.3	9.1
13.3	9.1
13.3	9.1
13.3	9.1
13.3	9.1
13.3	9.1
13.3	9.1
13.3	9.1
13.3	9.1
13.3	9.1
13.3	9.1
13.3	9.1
13.3	9.1
13.3	9.1
13.4	9.1
13.4	9.1
13.4	9.1
13.4	9.1
13.4	9.1
13.4	9.1
13.4	9.1
13.4	9.1
13.4	9.1
13.4	9.1
13.4	9.1
13.5	9.1
13.5	9.1
13.5	9.1
13.5	9.1
13.5	9.1
13.5	9.1
13.5	9.1
13.5	9.2
13.5	9.2
13.5	9.2
13.5	9.2
13.6	9.2
13.6	9.2
13.6	9.2
13.6	9.2
13.6	9.2
13.6	9.2
13.6	9.2
13.6	9.2
13.6	9.2
13.6	9.2
13.6	9.2
13.7	9.2
13.7	9.2
13.7	9.2
13.7	9.2
13.7	9.2
13.7	9.2
13.7	9.2
13.7	9.2
13.7	9.2
13.7	9.2
13.7	9.2
13.7	9.2
13.7	9.2
13.8	9.2
13.8	9.2
13.8	9.2
13.8	9.2
13.8	9.2
13.8	9.2
13.8	9.2
13.8	9.2
13.8	9.2
13.8	9.2
13.8	9.2
13.9	9.2
13.9	9.2
13.9	9.2
13.9	9.2
13.9	9.2
13.9	9.2
13.9	9.2
13.9	9.2
13.9	9.3
13.9	9.3
13.9	9.3
13.9	9.3
14	9.3
14	9.3
14	9.3
14	9.3
14	9.3
14	9.3
14	9.3
14	9.3
14	9.3
14	9.3
14.1	9.3
14.1	9.3
14.1	9.3
14.1	9.3
14.1	9.3
14.1	9.3
14.1	9.3
14.1	9.3
14.1	9.3
14.1	9.3
14.1	9.3
14.1	9.3
14.1	9.3
14.2	9.3
14.2	9.3
14.2	9.3
14.2	9.3
14.2	9.3
14.2	9.3
14.2	9.3
14.2	9.3
14.3	9.3
14.3	9.3
14.3	9.3
14.3	9.3
14.3	9.3
14.3	9.3
14.4	9.3
14.4	9.3
14.4	9.3
14.4	9.3
14.4	9.3
14.4	9.3
14.4	9.3
14.4	9.3
14.4	9.3
14.4	9.3
14.4	9.4
14.4	9.4
14.4	9.4
14.5	9.4
14.5	9.4
14.5	9.4
14.5	9.4
14.5	9.4
14.5	9.4
14.5	9.4
14.5	9.4
14.5	9.4
14.5	9.4
14.5	9.4
14.5	9.4
14.5	9.4
14.5	9.4
14.5	9.4
14.5	9.4
14.5	9.4
14.5	9.4
14.5	9.4
14.5	9.4
14.5	9.4
14.6	9.4
14.6	9.4
14.6	9.4
14.6	9.4
14.6	9.4
14.6	9.4
14.6	9.4
14.7	9.4
14.7	9.4
14.7	9.4
14.7	9.4
14.7	9.4
14.7	9.4
14.7	9.4
14.7	9.4
14.7	9.4
14.8	9.4
14.8	9.4
14.8	9.4
14.8	9.4
14.8	9.4
14.8	9.4
14.9	9.4
14.9	9.4
14.9	9.4
14.9	9.4
14.9	9.4
14.9	9.4
14.9	9.5
14.9	9.5
14.9	9.5
14.9	9.5
14.9	9.5
15	9.5
15	9.5
15	9.5
15	9.5
15	9.5
15	9.5
15	9.5
15	9.5
15.1	9.5
15.1	9.5
15.1	9.5
15.1	9.5
15.1	9.5
15.1	9.5
15.1	9.5
15.2	9.5
15.2	9.5
15.2	9.5
15.2	9.5
15.2	9.5
15.2	9.5
15.2	9.5
15.2	9.5
15.2	9.5
15.3	9.5
15.3	9.5
15.3	9.5
15.3	9.5
15.3	9.5
15.3	9.5
15.3	9.5
15.3	9.5
15.3	9.5
15.3	9.5
15.4	9.5
15.4	9.5
15.4	9.5
15.4	9.5
15.4	9.5
15.4	9.5
15.4	9.5
15.4	9.6
15.5	9.6
15.5	9.6
15.5	9.6
15.5	9.6
15.5	9.6
15.5	9.6
15.5	9.6
15.6	9.6
15.6	9.6
15.6	9.6
15.6	9.6
15.6	9.6
15.6	9.6
15.6	9.6
15.7	9.6
15.7	9.6
15.7	9.6
15.7	9.6
15.8	9.6
15.8	9.6
15.8	9.6
15.8	9.6
15.9	9.6
15.9	9.6
15.9	9.6
15.9	9.6
16	9.6
16	9.6
16	9.6
16	9.6
16	9.6
16	9.6
16	9.6
16.1	9.6
16.1	9.6
16.1	9.6
16.2	9.6
16.2	9.6
16.2	9.6
16.2	9.6
16.2	9.6
16.3	9.6
16.3	9.6
16.3	9.6
16.4	9.6
16.4	9.6
16.4	9.6
16.4	9.6
16.5	9.7
16.5	9.7
16.5	9.7
16.5	9.7
16.5	9.7
16.5	9.7
16.6	9.7
16.6	9.7
16.6	9.7
16.6	9.7
16.7	9.7
16.7	9.7
16.7	9.7
16.8	9.7
16.8	9.7
16.8	9.7
16.8	9.7
16.8	9.7
16.8	9.7
16.9	9.7
16.9	9.7
16.9	9.7
16.9	9.7
16.9	9.7
17	9.7
17.1	9.7
17.1	9.7
17.2	9.7
17.2	9.7
17.3	9.7
17.4	9.7
17.4	9.7
17.4	9.7
17.5	9.7
17.5	9.7
17.6	9.7
17.6	9.7
17.7	9.7
17.8	9.7
17.8	9.7
17.9	9.7
17.9	9.7
17.9	9.7
18	9.7
18	9.7
18.1	9.7
18.2	9.7
18.2	9.7
18.2	9.7
18.3	9.7
18.4	9.8
18.4	9.8
18.4	9.8
18.6	9.8
18.8	9.8
18.9	9.8
19	9.8
19	9.8
19.4	9.8
19.4	9.8
19.6	9.8
19.7	9.8
19.7	9.8
20.1	9.8
20.1	9.8
23.5	9.8
	9.8
	9.8
	9.8
	9.8
	9.8
	9.8
	9.8
	9.8
	9.8
	9.8
	9.8
	9.8
	9.8
	9.8
	9.8
	9.8
	9.8
	9.8
	9.8
	9.8
	9.8
	9.8
	9.8
	9.8
	9.8
	9.8
	9.8
	9.8
	9.8
	9.8
	9.9
	9.9
	9.9
	9.9
	9.9
	9.9
	9.9
	9.9
	9.9
	9.9
	9.9
	9.9
	9.9
	9.9
	9.9
	9.9
	9.9
	9.9
	9.9
	9.9
	9.9
	9.9
	9.9
	9.9
	9.9
	9.9
	9.9
	9.9
	9.9
	9.9
	9.9
	9.9
	9.9
	9.9
	9.9
	9.9
	9.9
	9.9
	9.9
	9.9
	9.9
	9.9
	9.9
	9.9
	9.9
	9.9
	9.9
	9.9
	9.9
	9.9
	9.9
	9.9
	9.9
	9.9
	9.9
	9.9
	9.9
	9.9
	9.9
	9.9
	9.9
	10
	10
	10
	10
	10
	10
	10
	10
	10
	10
	10
	10
	10
	10
	10
	10
	10
	10
	10
	10
	10
	10
	10
	10
	10
	10
	10
	10
	10
	10
	10
	10
	10
	10
	10
	10
	10
	10
	10
	10
	10
	10
	10
	10
	10
	10
	10
	10
	10
	10
	10
	10
	10
	10
	10
	10
	10
	10
	10
	10
	10
	10
	10.1
	10.1
	10.1
	10.1
	10.1
	10.1
	10.1
	10.1
	10.1
	10.1
	10.1
	10.1
	10.1
	10.1
	10.1
	10.1
	10.1
	10.1
	10.1
	10.1
	10.1
	10.1
	10.1
	10.1
	10.1
	10.1
	10.1
	10.1
	10.1
	10.1
	10.1
	10.1
	10.1
	10.1
	10.1
	10.1
	10.1
	10.1
	10.1
	10.1
	10.1
	10.1
	10.1
	10.1
	10.1
	10.1
	10.1
	10.1
	10.2
	10.2
	10.2
	10.2
	10.2
	10.2
	10.2
	10.2
	10.2
	10.2
	10.2
	10.2
	10.2
	10.2
	10.2
	10.2
	10.2
	10.2
	10.2
	10.2
	10.2
	10.2
	10.2
	10.2
	10.2
	10.2
	10.2
	10.2
	10.2
	10.2
	10.2
	10.2
	10.2
	10.2
	10.2
	10.2
	10.2
	10.2
	10.2
	10.2
	10.2
	10.2
	10.2
	10.2
	10.2
	10.2
	10.2
	10.2
	10.2
	10.2
	10.2
	10.2
	10.2
	10.2
	10.2
	10.2
	10.2
	10.2
	10.2
	10.2
	10.2
	10.2
	10.2
	10.2
	10.3
	10.3
	10.3
	10.3
	10.3
	10.3
	10.3
	10.3
	10.3
	10.3
	10.3
	10.3
	10.3
	10.3
	10.3
	10.3
	10.3
	10.3
	10.3
	10.3
	10.3
	10.3
	10.3
	10.3
	10.3
	10.3
	10.3
	10.3
	10.3
	10.3
	10.3
	10.3
	10.3
	10.3
	10.3
	10.3
	10.3
	10.3
	10.3
	10.3
	10.3
	10.3
	10.3
	10.3
	10.3
	10.3
	10.3
	10.3
	10.3
	10.3
	10.3
	10.3
	10.3
	10.3
	10.3
	10.3
	10.3
	10.3
	10.3
	10.3
	10.3
	10.3
	10.4
	10.4
	10.4
	10.4
	10.4
	10.4
	10.4
	10.4
	10.4
	10.4
	10.4
	10.4
	10.4
	10.4
	10.4
	10.4
	10.4
	10.4
	10.4
	10.4
	10.4
	10.4
	10.4
	10.4
	10.4
	10.4
	10.4
	10.4
	10.4
	10.4
	10.4
	10.4
	10.4
	10.4
	10.4
	10.4
	10.4
	10.4
	10.4
	10.4
	10.4
	10.4
	10.4
	10.4
	10.4
	10.4
	10.4
	10.4
	10.5
	10.5
	10.5
	10.5
	10.5
	10.5
	10.5
	10.5
	10.5
	10.5
	10.5
	10.5
	10.5
	10.5
	10.5
	10.5
	10.5
	10.5
	10.5
	10.5
	10.5
	10.5
	10.5
	10.5
	10.5
	10.5
	10.5
	10.5
	10.5
	10.5
	10.5
	10.5
	10.5
	10.5
	10.5
	10.5
	10.5
	10.5
	10.5
	10.5
	10.5
	10.5
	10.5
	10.5
	10.5
	10.5
	10.5
	10.5
	10.5
	10.6
	10.6
	10.6
	10.6
	10.6
	10.6
	10.6
	10.6
	10.6
	10.6
	10.6
	10.6
	10.6
	10.6
	10.6
	10.6
	10.6
	10.6
	10.6
	10.6
	10.6
	10.6
	10.6
	10.6
	10.6
	10.6
	10.6
	10.6
	10.6
	10.6
	10.6
	10.6
	10.6
	10.6
	10.6
	10.6
	10.6
	10.7
	10.7
	10.7
	10.7
	10.7
	10.7
	10.7
	10.7
	10.7
	10.7
	10.7
	10.7
	10.7
	10.7
	10.7
	10.7
	10.7
	10.7
	10.7
	10.7
	10.7
	10.7
	10.7
	10.7
	10.7
	10.7
	10.7
	10.7
	10.7
	10.7
	10.7
	10.7
	10.7
	10.7
	10.7
	10.7
	10.7
	10.7
	10.7
	10.7
	10.7
	10.7
	10.7
	10.7
	10.7
	10.7
	10.7
	10.7
	10.7
	10.7
	10.7
	10.7
	10.7
	10.7
[truncated: 1,479 more rows]

## Sheet: Abundance of shrimp
Shrimp abundance (total and by species) collected in Laguna Madre (Mexico)
		Trawl	Total shrimp	Penaeus aztecus	Penaeus duorarum
Seagrass bed	Month (2005)	(replicate)	(ind./100 m2)	(ind./100 m2)	(ind./100 m2)
Distant	January	1	86	41	11
Distant	January	2	59	29	3
Distant	January	3	76	32	7
Distant	February	1	116	53	51
Distant	February	2	90	29	49
Distant	February	3	85	28	47
Distant	March	1	40	21	11
Distant	March	2	41	22	17
Distant	March	3	61	37	21
Distant	April	1	31	20	11
Distant	April	2	0	0	0
Distant	April	3	41	20	11
Distant	May	1	30	17	6
Distant	May	2	35	19	6
Distant	May	3	34	20	4
Distant	June	1	35	21	10
Distant	June	2	31	17	4
Distant	June	3	21	6	3
Distant	July	1	11	10	1
Distant	July	2	12	10	1
Distant	July	3	16	14	1
Distant	August	1	19	11	3
Distant	August	2	26	10	1
Distant	August	3	22	11	1
Distant	September	1	29	13	0
Distant	September	2	17	5	0
Distant	September	3	34	11	1
Distant	October	1	73	43	1
Distant	October	2	68	41	2
Distant	October	3	67	28	9
Distant	November	1	53	42	0
Distant	November	2	50	33	3
Distant	November	3	60	36	3
Distant	December	1	36	19	4
Distant	December	2	35	13	3
Distant	December	3	34	17	0
Nearby	January	1	51	27	9
Nearby	January	2	91	47	18
Nearby	January	3	117	52	29
Nearby	February	1	284	40	116
Nearby	February	2	146	36	68
Nearby	February	3	204	80	72
Nearby	March	1	128	43	36
Nearby	March	2	232	124	52
Nearby	March	3	204	80	76
Nearby	April	1	149	93	19
Nearby	April	2	224	115	50
Nearby	April	3	195	111	34
Nearby	May	1	103	50	10
Nearby	May	2	78	34	12
Nearby	May	3	58	33	7
Nearby	June	1	43	23	2
Nearby	June	2	29	14	2
Nearby	June	3	24	7	6
Nearby	July	1	21	12	5
Nearby	July	2	22	16	1
Nearby	July	3	28	13	10
Nearby	August	1	74	33	6
Nearby	August	2	45	28	4
Nearby	August	3	33	19	4
Nearby	September	1	11	3	6
Nearby	September	2	34	4	6
Nearby	September	3	23	3	10
Nearby	October	1	56	21	12
Nearby	October	2	37	14	10
Nearby	October	3	19	5	8
Nearby	November	1	168	64	20
Nearby	November	2	284	132	24
Nearby	November	3	232	148	24
Nearby	December	1	126	72	12
Nearby	December	2	200	92	20
Nearby	December	3	29	12	9
Penaeid shrimps < 8.0 mm in carapace length were not identified to the species level because the lack of distinctive characteristics below that size.
