# Supplementary material for: Density-dependent condition of juvenile penaeid shrimps in seagrass-dominated aquatic vegetation beds located at different distance from a tidal inlet
Source: PeerJ. 2020 Dec 8;8:e10496. doi: 10.7717/peerj.10496 (PMC7731651; doi:10.7717/peerj.10496)
Supplement: Supplemental Information 3 — Log10 CL and Log10 W of both penaeid species collected within the seagrass beds throughout the study. Estimates for the predicted mean weight at a length of 11 mm CL (used as a condition indicator) for Penaeus aztecus and P. duorarum in both seagrass beds are included. [file peerj-08-10496-s003.xlsx]

## Sheet: CL vs W
Log10 CL and Log10 W of both penaeid species collected within the seagrass beds throughout the study.									CL: carapace length (mm)
									W: weight (g)
		Penaeus aztecus					Penaeus duorarum					Linear fitted function: Log10 W = a + b (Log10 CL)
	Seagrass bed	Log10 CL	Log10 W			Seagrass bed	Log10 CL	Log10 W				Penaeus aztecus							ANOVA for linear regression
1	Distant	0.90309	-0.823909		1	Distant	0.908485	-0.721246						a	b	r2	n		F	p-value
2	Distant	0.929419	-0.721246		2	Distant	0.908485	-0.638272				Distant seagrass bed		-3.41052	3.17367	0.919515	685		7803.03	0
3	Distant	0.908485	-0.69897		3	Distant	0.90309	-0.619789				Nearby seagrass bed		-3.36924	3.116	0.929178	1426		18682.7	0
4	Distant	0.908485	-0.677781		4	Distant	0.90309	-0.60206
5	Distant	0.919078	-0.657577		5	Distant	0.939519	-0.60206
6	Distant	0.90309	-0.638272		6	Distant	0.991226	-0.60206				Linear fitted function: Log10 W = a + b (Log10 CL)
7	Distant	0.934498	-0.638272		7	Distant	0.90309	-0.585027				Penaeus duorarum							ANOVA for linear regression
8	Distant	0.919078	-0.60206		8	Distant	0.90309	-0.552842						a	b	r2	n		F	p-value
9	Distant	0.913814	-0.585027		9	Distant	0.939519	-0.552842				Distant seagrass bed		-3.3128	3.08294	0.931306	258		3470.69	6.88821e-151
10	Distant	0.924279	-0.585027		10	Distant	0.944483	-0.552842				Nearby seagrass bed		-3.27126	3.0264	0.927456	686		8744.79	0
11	Distant	0.944483	-0.585027		11	Distant	0.913814	-0.537602
12	Distant	0.913814	-0.568636		12	Distant	0.934498	-0.537602
13	Distant	0.929419	-0.568636		13	Distant	0.959041	-0.537602
14	Distant	0.908485	-0.552842		14	Distant	0.90309	-0.522879
15	Distant	0.939519	-0.552842		15	Distant	0.919078	-0.522879
16	Distant	0.908485	-0.537602		16	Distant	0.908485	-0.508638
17	Distant	0.919078	-0.537602		17	Distant	0.934498	-0.508638
18	Distant	0.934498	-0.537602		18	Distant	0.90309	-0.49485
19	Distant	0.908485	-0.522879		19	Distant	0.90309	-0.49485
20	Distant	0.924279	-0.522879		20	Distant	0.90309	-0.49485
21	Distant	0.929419	-0.522879		21	Distant	0.908485	-0.49485
22	Distant	0.934498	-0.522879		22	Distant	0.94939	-0.49485
23	Distant	0.90309	-0.508638		23	Distant	0.90309	-0.481486
24	Distant	0.913814	-0.508638		24	Distant	0.90309	-0.481486
25	Distant	0.924279	-0.508638		25	Distant	0.913814	-0.481486
26	Distant	0.924279	-0.508638		26	Distant	0.924279	-0.481486
27	Distant	0.963788	-0.508638		27	Distant	0.929419	-0.468521
28	Distant	0.908485	-0.49485		28	Distant	0.934498	-0.468521
29	Distant	0.908485	-0.49485		29	Distant	0.919078	-0.455932
30	Distant	0.977724	-0.49485		30	Distant	0.929419	-0.455932
31	Distant	1	-0.481486		31	Distant	0.934498	-0.455932
32	Distant	1.01703	-0.481486		32	Distant	0.913814	-0.443697
33	Distant	0.90309	-0.468521		33	Distant	0.913814	-0.431798
34	Distant	0.90309	-0.468521		34	Distant	0.919078	-0.431798
35	Distant	0.913814	-0.468521		35	Distant	0.939519	-0.431798
36	Distant	0.919078	-0.468521		36	Distant	0.94939	-0.431798
37	Distant	0.924279	-0.468521		37	Distant	1	-0.431798
38	Distant	0.939519	-0.468521		38	Distant	0.919078	-0.420216
39	Distant	0.954243	-0.468521		39	Distant	0.924279	-0.420216
40	Distant	0.982271	-0.468521		40	Distant	0.944483	-0.420216
41	Distant	1.02938	-0.468521		41	Distant	0.94939	-0.420216
42	Distant	0.90309	-0.455932		42	Distant	0.963788	-0.420216
43	Distant	0.913814	-0.455932		43	Distant	0.977724	-0.420216
44	Distant	0.924279	-0.455932		44	Distant	0.924279	-0.408935
45	Distant	0.929419	-0.455932		45	Distant	0.939519	-0.408935
46	Distant	0.934498	-0.455932		46	Distant	0.944483	-0.408935
47	Distant	0.944483	-0.455932		47	Distant	0.973128	-0.408935
48	Distant	0.94939	-0.455932		48	Distant	0.944483	-0.39794
49	Distant	0.94939	-0.455932		49	Distant	0.944483	-0.39794
50	Distant	0.94939	-0.455932		50	Distant	0.963788	-0.39794
51	Distant	0.959041	-0.455932		51	Distant	1.01284	-0.39794
52	Distant	0.982271	-0.455932		52	Distant	0.919078	-0.387216
53	Distant	0.982271	-0.455932		53	Distant	0.939519	-0.387216
54	Distant	0.986772	-0.455932		54	Distant	0.934498	-0.376751
55	Distant	0.913814	-0.443697		55	Distant	0.94939	-0.376751
56	Distant	0.919078	-0.443697		56	Distant	0.977724	-0.376751
57	Distant	0.924279	-0.443697		57	Distant	0.944483	-0.366532
58	Distant	0.929419	-0.443697		58	Distant	0.944483	-0.366532
59	Distant	0.939519	-0.443697		59	Distant	0.913814	-0.356547
60	Distant	0.959041	-0.443697		60	Distant	0.939519	-0.356547
61	Distant	0.963788	-0.443697		61	Distant	0.94939	-0.356547
62	Distant	0.968483	-0.443697		62	Distant	0.954243	-0.356547
63	Distant	0.991226	-0.443697		63	Distant	0.939519	-0.346787
64	Distant	0.919078	-0.431798		64	Distant	0.939519	-0.346787
65	Distant	0.924279	-0.431798		65	Distant	0.94939	-0.346787
66	Distant	0.929419	-0.431798		66	Distant	0.973128	-0.346787
67	Distant	0.929419	-0.431798		67	Distant	0.977724	-0.346787
68	Distant	0.94939	-0.431798		68	Distant	0.939519	-0.337242
69	Distant	0.973128	-0.431798		69	Distant	0.944483	-0.337242
70	Distant	0.991226	-0.431798		70	Distant	0.963788	-0.337242
71	Distant	0.934498	-0.420216		71	Distant	0.963788	-0.337242
72	Distant	0.934498	-0.420216		72	Distant	0.94939	-0.327902
73	Distant	0.939519	-0.420216		73	Distant	0.963788	-0.327902
74	Distant	0.954243	-0.420216		74	Distant	1.01284	-0.327902
75	Distant	0.968483	-0.420216		75	Distant	0.939519	-0.318759
76	Distant	0.968483	-0.420216		76	Distant	0.968483	-0.318759
77	Distant	0.968483	-0.420216		77	Distant	0.963788	-0.309804
78	Distant	0.995635	-0.420216		78	Distant	0.963788	-0.309804
79	Distant	0.944483	-0.408935		79	Distant	0.968483	-0.309804
80	Distant	0.924279	-0.39794		80	Distant	0.968483	-0.309804
81	Distant	0.929419	-0.39794		81	Distant	0.973128	-0.30103
82	Distant	0.934498	-0.39794		82	Distant	1.00432	-0.29243
83	Distant	0.944483	-0.39794		83	Distant	1.04139	-0.29243
84	Distant	0.94939	-0.39794		84	Distant	0.986772	-0.283997
85	Distant	0.963788	-0.39794		85	Distant	1.00432	-0.283997
86	Distant	0.991226	-0.39794		86	Distant	0.968483	-0.275724
87	Distant	0.934498	-0.387216		87	Distant	0.986772	-0.275724
88	Distant	0.944483	-0.387216		88	Distant	0.968483	-0.267606
89	Distant	0.94939	-0.387216		89	Distant	0.991226	-0.267606
90	Distant	0.977724	-0.387216		90	Distant	1.03743	-0.267606
91	Distant	0.977724	-0.387216		91	Distant	0.973128	-0.259637
92	Distant	0.929419	-0.376751		92	Distant	0.982271	-0.259637
93	Distant	0.94939	-0.376751		93	Distant	0.973128	-0.251812
94	Distant	0.968483	-0.376751		94	Distant	1.03342	-0.251812
95	Distant	0.968483	-0.376751		95	Distant	0.968483	-0.244125
96	Distant	0.982271	-0.376751		96	Distant	0.991226	-0.244125
97	Distant	0.982271	-0.376751		97	Distant	1.01703	-0.244125
98	Distant	0.991226	-0.376751		98	Distant	0.968483	-0.236572
99	Distant	0.991226	-0.376751		99	Distant	0.995635	-0.236572
100	Distant	1.0086	-0.376751		100	Distant	1.0086	-0.236572
101	Distant	0.934498	-0.366532		101	Distant	0.986772	-0.229148
102	Distant	0.94939	-0.366532		102	Distant	0.986772	-0.229148
103	Distant	0.959041	-0.366532		103	Distant	0.995635	-0.229148
104	Distant	0.959041	-0.366532		104	Distant	1	-0.229148
105	Distant	0.963788	-0.366532		105	Distant	1.01703	-0.229148
106	Distant	0.968483	-0.366532		106	Distant	0.995635	-0.221849
107	Distant	0.973128	-0.366532		107	Distant	0.995635	-0.221849
108	Distant	0.982271	-0.366532		108	Distant	1.03743	-0.221849
109	Distant	0.991226	-0.366532		109	Distant	1.0569	-0.21467
110	Distant	0.929419	-0.356547		110	Distant	1.00432	-0.207608
111	Distant	0.94939	-0.356547		111	Distant	1.01284	-0.207608
112	Distant	0.94939	-0.356547		112	Distant	1.01703	-0.207608
113	Distant	0.94939	-0.356547		113	Distant	0.995635	-0.200659
114	Distant	0.94939	-0.356547		114	Distant	1.02531	-0.200659
115	Distant	0.954243	-0.356547		115	Distant	1.02938	-0.200659
116	Distant	0.959041	-0.356547		116	Distant	1	-0.180456
117	Distant	0.963788	-0.356547		117	Distant	1.00432	-0.173925
118	Distant	0.968483	-0.356547		118	Distant	1.01284	-0.173925
119	Distant	0.973128	-0.356547		119	Distant	1.02119	-0.161151
120	Distant	0.986772	-0.356547		120	Distant	1.02531	-0.154902
121	Distant	0.995635	-0.356547		121	Distant	1.05308	-0.154902
122	Distant	0.94939	-0.346787		122	Distant	0.986772	-0.148742
123	Distant	0.954243	-0.346787		123	Distant	1.0086	-0.148742
124	Distant	0.959041	-0.346787		124	Distant	1.0086	-0.148742
125	Distant	0.968483	-0.346787		125	Distant	1.01703	-0.142668
126	Distant	0.968483	-0.346787		126	Distant	1.03743	-0.142668
127	Distant	0.982271	-0.346787		127	Distant	1.0607	-0.142668
128	Distant	0.963788	-0.337242		128	Distant	1.03342	-0.136677
129	Distant	0.968483	-0.337242		129	Distant	1.01284	-0.130768
130	Distant	0.968483	-0.337242		130	Distant	1.03342	-0.130768
131	Distant	0.977724	-0.337242		131	Distant	1.04532	-0.124939
132	Distant	0.986772	-0.337242		132	Distant	1.02531	-0.119186
133	Distant	1.00432	-0.337242		133	Distant	1.04922	-0.119186
134	Distant	1.0086	-0.337242		134	Distant	1.07555	-0.119186
135	Distant	1.01284	-0.337242		135	Distant	0.995635	-0.113509
136	Distant	1.0569	-0.337242		136	Distant	1.02119	-0.113509
137	Distant	0.934498	-0.327902		137	Distant	1.02938	-0.113509
138	Distant	0.973128	-0.327902		138	Distant	1.04532	-0.113509
139	Distant	0.986772	-0.327902		139	Distant	1.04139	-0.107905
140	Distant	0.995635	-0.327902		140	Distant	1.03342	-0.091515
141	Distant	1.01284	-0.327902		141	Distant	1.03743	-0.091515
142	Distant	0.963788	-0.318759		142	Distant	1.0569	-0.0809219
143	Distant	0.973128	-0.318759		143	Distant	1.07188	-0.0809219
144	Distant	0.977724	-0.318759		144	Distant	1.0086	-0.0757207
145	Distant	1.01703	-0.318759		145	Distant	1.06819	-0.0757207
146	Distant	0.959041	-0.309804		146	Distant	1.03743	-0.0705811
147	Distant	0.991226	-0.309804		147	Distant	1.03342	-0.0604807
148	Distant	0.995635	-0.309804		148	Distant	1.07188	-0.0555173
149	Distant	1.02938	-0.309804		149	Distant	1.04139	-0.0457575
150	Distant	0.977724	-0.30103		150	Distant	1.04532	-0.0457575
151	Distant	0.982271	-0.30103		151	Distant	1.04922	-0.0409586
152	Distant	0.982271	-0.30103		152	Distant	1.10037	-0.0362122
153	Distant	0.991226	-0.30103		153	Distant	1.03743	-0.0315171
154	Distant	1	-0.30103		154	Distant	1.0607	-0.0315171
155	Distant	1.02119	-0.30103		155	Distant	1.05308	-0.0268721
156	Distant	1.03743	-0.30103		156	Distant	1.0607	-0.0268721
157	Distant	0.968483	-0.29243		157	Distant	1.05308	-0.0222764
158	Distant	0.977724	-0.29243		158	Distant	1.0607	-0.0222764
159	Distant	1.0086	-0.29243		159	Distant	1.07188	-0.0177288
160	Distant	0.977724	-0.283997		160	Distant	1.08636	-0.0177288
161	Distant	0.982271	-0.283997		161	Distant	1.05308	-0.0132283
162	Distant	0.986772	-0.283997		162	Distant	1.09342	-0.0132283
163	Distant	0.995635	-0.283997		163	Distant	1.12385	-0.0132283
164	Distant	1	-0.283997		164	Distant	1.07918	0
165	Distant	1.01703	-0.283997		165	Distant	1.09342	0
166	Distant	0.995635	-0.275724		166	Distant	1.04532	0.00432137
167	Distant	1	-0.275724		167	Distant	1.09342	0.00860017
168	Distant	0.973128	-0.267606		168	Distant	1.0569	0.0211893
169	Distant	0.973128	-0.267606		169	Distant	1.0607	0.0211893
170	Distant	0.977724	-0.267606		170	Distant	1.09691	0.0211893
171	Distant	0.991226	-0.267606		171	Distant	1.06819	0.0334238
172	Distant	0.991226	-0.267606		172	Distant	1.08279	0.0374265
173	Distant	0.995635	-0.267606		173	Distant	1.06446	0.049218
174	Distant	1	-0.267606		174	Distant	1.08279	0.0530784
175	Distant	0.977724	-0.259637		175	Distant	1.07188	0.0569049
176	Distant	0.986772	-0.259637		176	Distant	1.1038	0.0606978
177	Distant	1.00432	-0.259637		177	Distant	1.09342	0.064458
178	Distant	1.0086	-0.259637		178	Distant	1.07918	0.0681859
179	Distant	1.02119	-0.259637		179	Distant	1.08991	0.0681859
180	Distant	0.963788	-0.251812		180	Distant	1.08991	0.071882
181	Distant	0.986772	-0.251812		181	Distant	1.12057	0.071882
182	Distant	0.986772	-0.251812		182	Distant	1.10037	0.075547
183	Distant	1.00432	-0.251812		183	Distant	1.1038	0.075547
184	Distant	1.02119	-0.251812		184	Distant	1.08636	0.0827854
185	Distant	0.982271	-0.244125		185	Distant	1.1038	0.0827854
186	Distant	0.991226	-0.244125		186	Distant	1.14301	0.0899051
187	Distant	0.991226	-0.244125		187	Distant	1.09691	0.0934217
188	Distant	0.995635	-0.244125		188	Distant	1.07555	0.09691
189	Distant	1.01703	-0.244125		189	Distant	1.11727	0.09691
190	Distant	0.973128	-0.236572		190	Distant	1.10721	0.100371
191	Distant	0.977724	-0.236572		191	Distant	1.11394	0.100371
192	Distant	0.977724	-0.236572		192	Distant	1.12057	0.11059
193	Distant	0.995635	-0.236572		193	Distant	1.08279	0.113943
194	Distant	0.995635	-0.236572		194	Distant	1.1038	0.113943
195	Distant	1	-0.236572		195	Distant	1.11727	0.143015
196	Distant	1.0086	-0.236572		196	Distant	1.11394	0.146128
197	Distant	1.02938	-0.236572		197	Distant	1.09342	0.149219
198	Distant	0.977724	-0.229148		198	Distant	1.12057	0.149219
199	Distant	1	-0.229148		199	Distant	1.10721	0.161368
200	Distant	1.00432	-0.229148		200	Distant	1.12385	0.164353
201	Distant	1.0086	-0.229148		201	Distant	1.1271	0.164353
202	Distant	1.01703	-0.229148		202	Distant	1.12385	0.167317
203	Distant	1.06446	-0.229148		203	Distant	1.12385	0.187521
204	Distant	1	-0.221849		204	Distant	1.14922	0.187521
205	Distant	1.01284	-0.221849		205	Distant	1.11727	0.190332
206	Distant	1.01703	-0.221849		206	Distant	1.1271	0.190332
207	Distant	1.07918	-0.221849		207	Distant	1.12057	0.193125
208	Distant	0.982271	-0.207608		208	Distant	1.15836	0.1959
209	Distant	1.0086	-0.207608		209	Distant	1.14301	0.198657
210	Distant	0.977724	-0.200659		210	Distant	1.14922	0.20412
211	Distant	0.982271	-0.200659		211	Distant	1.13033	0.206826
212	Distant	0.986772	-0.200659		212	Distant	1.14613	0.209515
213	Distant	0.991226	-0.200659		213	Distant	1.14922	0.217484
214	Distant	1.00432	-0.200659		214	Distant	1.15836	0.217484
215	Distant	1.00432	-0.200659		215	Distant	1.1271	0.230449
216	Distant	1.01284	-0.200659		216	Distant	1.16137	0.230449
217	Distant	1.04922	-0.200659		217	Distant	1.17319	0.238046
218	Distant	0.973128	-0.19382		218	Distant	1.15836	0.240549
219	Distant	0.986772	-0.19382		219	Distant	1.15836	0.243038
220	Distant	1.00432	-0.19382		220	Distant	1.16137	0.245513
221	Distant	1.0086	-0.19382		221	Distant	1.1271	0.252853
222	Distant	1.01284	-0.19382		222	Distant	1.13354	0.255273
223	Distant	1.01703	-0.19382		223	Distant	1.14922	0.255273
224	Distant	1.01284	-0.187087		224	Distant	1.16137	0.255273
225	Distant	1.01703	-0.187087		225	Distant	1.15836	0.257679
226	Distant	1.01703	-0.187087		226	Distant	1.15534	0.262451
227	Distant	1.02119	-0.180456		227	Distant	1.16137	0.262451
228	Distant	1.02938	-0.180456		228	Distant	1.14613	0.264818
229	Distant	1.03342	-0.180456		229	Distant	1.13988	0.267172
230	Distant	1.05308	-0.180456		230	Distant	1.16137	0.269513
231	Distant	1.00432	-0.173925		231	Distant	1.13988	0.271842
232	Distant	1.01284	-0.173925		232	Distant	1.16137	0.278754
233	Distant	0.995635	-0.167491		233	Distant	1.17319	0.281033
234	Distant	1.0086	-0.167491		234	Distant	1.17026	0.283301
235	Distant	1.01703	-0.167491		235	Distant	1.16137	0.285557
236	Distant	1.01703	-0.167491		236	Distant	1.17319	0.296665
237	Distant	1.06446	-0.167491		237	Distant	1.16137	0.298853
238	Distant	1.06446	-0.167491		238	Distant	1.15229	0.311754
239	Distant	1.03342	-0.161151		239	Distant	1.17319	0.313867
240	Distant	1.0086	-0.154902		240	Distant	1.17319	0.31597
241	Distant	1.01284	-0.154902		241	Distant	1.17319	0.380211
242	Distant	1.03342	-0.154902		242	Distant	0.90309	-0.468521
243	Distant	1.03743	-0.154902		243	Distant	0.919078	-0.420216
244	Distant	1.01284	-0.148742		244	Distant	0.929419	-0.443697
245	Distant	1.02938	-0.148742		245	Distant	0.959041	-0.283997
246	Distant	1.0086	-0.142668		246	Distant	0.977724	-0.161151
247	Distant	1.03342	-0.142668		247	Distant	1.02938	-0.0705811
248	Distant	1.03342	-0.142668		248	Distant	1.07555	0.0569049
249	Distant	1.0086	-0.136677		249	Distant	1.09691	0.113943
250	Distant	1.01284	-0.136677		250	Distant	1.13672	0.184691
251	Distant	1.03342	-0.136677		251	Distant	1.16435	0.311754
252	Distant	1.04532	-0.136677		252	Distant	1.03743	-0.0757207
253	Distant	1.0086	-0.130768		253	Distant	1.04922	-0.0315171
254	Distant	1.01284	-0.130768		254	Distant	0.90309	-0.481486
255	Distant	1.01703	-0.130768		255	Distant	0.908485	-0.481486
256	Distant	1.0569	-0.130768		256	Distant	1.04922	-0.0315171
257	Distant	1.0086	-0.124939		257	Distant	1.04922	-0.0268721
258	Distant	1.01703	-0.124939		258	Distant	1.05308	-0.0655015
259	Distant	1.02531	-0.124939		259	Nearby	0.913814	-0.721246
260	Distant	1.02531	-0.124939		260	Nearby	0.913814	-0.657577
261	Distant	1.04139	-0.124939		261	Nearby	0.934498	-0.657577
262	Distant	1.04922	-0.124939		262	Nearby	0.934498	-0.657577
263	Distant	1.05308	-0.124939		263	Nearby	0.934498	-0.657577
264	Distant	1.01703	-0.119186		264	Nearby	0.934498	-0.657577
265	Distant	1.02531	-0.119186		265	Nearby	0.934498	-0.657577
266	Distant	1.02938	-0.119186		266	Nearby	0.90309	-0.60206
267	Distant	1.06446	-0.113509		267	Nearby	0.908485	-0.585027
268	Distant	1.02531	-0.107905		268	Nearby	0.908485	-0.585027
269	Distant	1.06819	-0.107905		269	Nearby	0.919078	-0.585027
270	Distant	1.07188	-0.107905		270	Nearby	0.90309	-0.568636
271	Distant	1.03743	-0.102373		271	Nearby	0.944483	-0.568636
272	Distant	1.04139	-0.102373		272	Nearby	0.977724	-0.568636
273	Distant	1.0569	-0.102373		273	Nearby	0.90309	-0.552842
274	Distant	1.02938	-0.09691		274	Nearby	0.90309	-0.552842
275	Distant	1.03743	-0.09691		275	Nearby	0.90309	-0.552842
276	Distant	1.04532	-0.09691		276	Nearby	0.90309	-0.552842
277	Distant	1.04532	-0.09691		277	Nearby	0.919078	-0.552842
278	Distant	1.0607	-0.09691		278	Nearby	0.919078	-0.552842
279	Distant	1.03743	-0.091515		279	Nearby	0.919078	-0.552842
280	Distant	1.04532	-0.091515		280	Nearby	0.919078	-0.552842
281	Distant	1.05308	-0.091515		281	Nearby	0.934498	-0.552842
282	Distant	1.02119	-0.0861861		282	Nearby	0.934498	-0.552842
283	Distant	1.04139	-0.0861861		283	Nearby	0.90309	-0.537602
284	Distant	1.06819	-0.0861861		284	Nearby	0.90309	-0.537602
285	Distant	1.06819	-0.0861861		285	Nearby	0.908485	-0.537602
286	Distant	1.02938	-0.0757207		286	Nearby	0.908485	-0.537602
287	Distant	1.02938	-0.0757207		287	Nearby	0.908485	-0.537602
288	Distant	1.04139	-0.0757207		288	Nearby	0.908485	-0.537602
289	Distant	1.04532	-0.0757207		289	Nearby	0.934498	-0.537602
290	Distant	1.06446	-0.0757207		290	Nearby	0.934498	-0.537602
291	Distant	1.07188	-0.0757207		291	Nearby	0.954243	-0.537602
292	Distant	1.08279	-0.0757207		292	Nearby	0.986772	-0.537602
293	Distant	1.03743	-0.0705811		293	Nearby	0.90309	-0.522879
294	Distant	1.06819	-0.0705811		294	Nearby	0.90309	-0.522879
295	Distant	1.07188	-0.0705811		295	Nearby	0.908485	-0.522879
296	Distant	1.07555	-0.0705811		296	Nearby	0.924279	-0.522879
297	Distant	1.08991	-0.0705811		297	Nearby	0.924279	-0.522879
298	Distant	1.03743	-0.0655015		298	Nearby	0.968483	-0.522879
299	Distant	1.03743	-0.0655015		299	Nearby	0.90309	-0.508638
300	Distant	1.04139	-0.0655015		300	Nearby	0.90309	-0.508638
301	Distant	1.04532	-0.0655015		301	Nearby	0.90309	-0.508638
302	Distant	1.06446	-0.0655015		302	Nearby	0.90309	-0.508638
303	Distant	1.07188	-0.0655015		303	Nearby	0.913814	-0.508638
304	Distant	1.11394	-0.0655015		304	Nearby	0.913814	-0.508638
305	Distant	1.02531	-0.0604807		305	Nearby	0.913814	-0.508638
306	Distant	1.05308	-0.0604807		306	Nearby	0.913814	-0.508638
307	Distant	1.06819	-0.0604807		307	Nearby	0.908485	-0.49485
308	Distant	1.07188	-0.0604807		308	Nearby	0.908485	-0.49485
309	Distant	1.03342	-0.0555173		309	Nearby	0.908485	-0.49485
310	Distant	1.03743	-0.0555173		310	Nearby	0.908485	-0.49485
311	Distant	1.04922	-0.0555173		311	Nearby	0.934498	-0.49485
312	Distant	1.08279	-0.0555173		312	Nearby	0.944483	-0.49485
313	Distant	1.09342	-0.0555173		313	Nearby	0.90309	-0.481486
314	Distant	1.02119	-0.05061		314	Nearby	0.90309	-0.481486
315	Distant	1.04532	-0.05061		315	Nearby	0.90309	-0.481486
316	Distant	1.05308	-0.05061		316	Nearby	0.90309	-0.481486
317	Distant	1.06819	-0.05061		317	Nearby	0.908485	-0.481486
318	Distant	1.07918	-0.05061		318	Nearby	0.919078	-0.481486
319	Distant	1.13033	-0.05061		319	Nearby	0.919078	-0.481486
320	Distant	1.0607	-0.0457575		320	Nearby	0.924279	-0.481486
321	Distant	1.0607	-0.0457575		321	Nearby	0.929419	-0.481486
322	Distant	1.07555	-0.0457575		322	Nearby	0.944483	-0.481486
323	Distant	1.1038	-0.0457575		323	Nearby	0.944483	-0.481486
324	Distant	1.06446	-0.0409586		324	Nearby	0.959041	-0.481486
325	Distant	1.03743	-0.0362122		325	Nearby	0.929419	-0.468521
326	Distant	1.04532	-0.0362122		326	Nearby	0.929419	-0.468521
327	Distant	1.0607	-0.0362122		327	Nearby	0.929419	-0.468521
328	Distant	1.06446	-0.0362122		328	Nearby	0.929419	-0.468521
329	Distant	1.07555	-0.0362122		329	Nearby	0.929419	-0.468521
330	Distant	1.04922	-0.0315171		330	Nearby	0.934498	-0.468521
331	Distant	1.05308	-0.0315171		331	Nearby	0.944483	-0.468521
332	Distant	1.06446	-0.0315171		332	Nearby	0.944483	-0.468521
333	Distant	1.06819	-0.0315171		333	Nearby	0.908485	-0.455932
334	Distant	1.08636	-0.0315171		334	Nearby	0.908485	-0.455932
335	Distant	1.03743	-0.0268721		335	Nearby	0.908485	-0.455932
336	Distant	1.04532	-0.0268721		336	Nearby	0.908485	-0.455932
337	Distant	1.0607	-0.0268721		337	Nearby	0.913814	-0.455932
338	Distant	1.07188	-0.0268721		338	Nearby	0.919078	-0.455932
339	Distant	1.03342	-0.0222764		339	Nearby	0.939519	-0.455932
340	Distant	1.05308	-0.0222764		340	Nearby	0.94939	-0.455932
341	Distant	1.0607	-0.0222764		341	Nearby	0.94939	-0.455932
342	Distant	1.03743	-0.0177288		342	Nearby	0.94939	-0.455932
343	Distant	1.04922	-0.0177288		343	Nearby	0.94939	-0.455932
344	Distant	1.06819	-0.0177288		344	Nearby	0.94939	-0.455932
345	Distant	1.06819	-0.0177288		345	Nearby	0.94939	-0.455932
346	Distant	1.07188	-0.0177288		346	Nearby	0.94939	-0.455932
347	Distant	1.12057	-0.0177288		347	Nearby	0.94939	-0.455932
348	Distant	1.04139	-0.0132283		348	Nearby	0.94939	-0.455932
349	Distant	1.06819	-0.0132283		349	Nearby	0.94939	-0.455932
350	Distant	1.08279	-0.0132283		350	Nearby	0.94939	-0.455932
351	Distant	1.07188	-0.00877392		351	Nearby	0.94939	-0.455932
352	Distant	1.07555	-0.00877392		352	Nearby	0.913814	-0.443697
353	Distant	1.09691	-0.00877392		353	Nearby	0.913814	-0.443697
354	Distant	1.06819	-0.00436481		354	Nearby	0.913814	-0.443697
355	Distant	1.07555	-0.00436481		355	Nearby	0.913814	-0.443697
356	Distant	1.04922	0		356	Nearby	0.913814	-0.443697
357	Distant	1.07188	0		357	Nearby	0.944483	-0.443697
358	Distant	1.07918	0		358	Nearby	0.963788	-0.443697
359	Distant	1.07918	0		359	Nearby	0.908485	-0.431798
360	Distant	1.04532	0.00432137		360	Nearby	0.908485	-0.431798
361	Distant	1.06819	0.00432137		361	Nearby	0.919078	-0.431798
362	Distant	1.07188	0.00432137		362	Nearby	0.929419	-0.431798
363	Distant	1.07555	0.00860017		363	Nearby	0.929419	-0.431798
364	Distant	1.06819	0.0128372		364	Nearby	0.929419	-0.431798
365	Distant	1.08279	0.0128372		365	Nearby	0.929419	-0.431798
366	Distant	1.11394	0.0128372		366	Nearby	0.929419	-0.431798
367	Distant	1.04532	0.0170333		367	Nearby	0.924279	-0.420216
368	Distant	1.0569	0.0170333		368	Nearby	0.929419	-0.420216
369	Distant	1.07918	0.0170333		369	Nearby	0.944483	-0.420216
370	Distant	1.07918	0.0211893		370	Nearby	0.959041	-0.420216
371	Distant	1.04922	0.0253059		371	Nearby	0.959041	-0.420216
372	Distant	1.0607	0.0253059		372	Nearby	0.959041	-0.420216
373	Distant	1.06819	0.0253059		373	Nearby	0.959041	-0.420216
374	Distant	1.07918	0.0253059		374	Nearby	0.919078	-0.408935
375	Distant	1.07188	0.0293838		375	Nearby	0.919078	-0.408935
376	Distant	1.08636	0.0293838		376	Nearby	0.919078	-0.408935
377	Distant	1.08991	0.0293838		377	Nearby	0.919078	-0.408935
378	Distant	1.1271	0.0293838		378	Nearby	0.934498	-0.408935
379	Distant	1.06446	0.0334238		379	Nearby	0.934498	-0.408935
380	Distant	1.06446	0.0334238		380	Nearby	0.934498	-0.408935
381	Distant	1.07555	0.0334238		381	Nearby	0.934498	-0.408935
382	Distant	1.09342	0.0374265		382	Nearby	0.934498	-0.408935
383	Distant	1.13354	0.0374265		383	Nearby	0.934498	-0.408935
384	Distant	1.07188	0.0413927		384	Nearby	0.939519	-0.408935
385	Distant	1.08991	0.0413927		385	Nearby	0.939519	-0.408935
386	Distant	1.09342	0.0413927		386	Nearby	0.939519	-0.408935
387	Distant	1.06446	0.045323		387	Nearby	0.939519	-0.408935
388	Distant	1.13354	0.045323		388	Nearby	0.939519	-0.408935
389	Distant	1.07188	0.049218		389	Nearby	0.944483	-0.408935
390	Distant	1.07555	0.049218		390	Nearby	0.944483	-0.408935
391	Distant	1.09691	0.049218		391	Nearby	0.944483	-0.408935
392	Distant	1.10721	0.049218		392	Nearby	0.944483	-0.408935
393	Distant	1.11394	0.049218		393	Nearby	0.944483	-0.408935
394	Distant	1.07918	0.0530784		394	Nearby	0.977724	-0.408935
395	Distant	1.08279	0.0530784		395	Nearby	0.939519	-0.39794
396	Distant	1.08636	0.0530784		396	Nearby	0.939519	-0.39794
397	Distant	1.08991	0.0530784		397	Nearby	0.939519	-0.39794
398	Distant	1.09691	0.0530784		398	Nearby	0.939519	-0.39794
399	Distant	1.11727	0.0530784		399	Nearby	0.939519	-0.39794
400	Distant	1.08279	0.0569049		400	Nearby	0.944483	-0.39794
401	Distant	1.10721	0.0569049		401	Nearby	0.954243	-0.39794
402	Distant	1.11727	0.0569049		402	Nearby	0.954243	-0.39794
403	Distant	1.07188	0.0606978		403	Nearby	0.982271	-0.39794
404	Distant	1.07918	0.0606978		404	Nearby	0.934498	-0.387216
405	Distant	1.08991	0.0606978		405	Nearby	0.963788	-0.387216
406	Distant	1.12057	0.0606978		406	Nearby	0.963788	-0.387216
407	Distant	1.07188	0.064458		407	Nearby	0.919078	-0.376751
408	Distant	1.07918	0.064458		408	Nearby	0.959041	-0.376751
409	Distant	1.07918	0.064458		409	Nearby	0.959041	-0.376751
410	Distant	1.10037	0.064458		410	Nearby	0.963788	-0.376751
411	Distant	1.1038	0.064458		411	Nearby	0.944483	-0.366532
412	Distant	1.10721	0.064458		412	Nearby	0.94939	-0.366532
413	Distant	1.07555	0.0681859		413	Nearby	0.94939	-0.366532
414	Distant	1.08991	0.0681859		414	Nearby	0.954243	-0.366532
415	Distant	1.07918	0.071882		415	Nearby	0.968483	-0.366532
416	Distant	1.08636	0.071882		416	Nearby	0.982271	-0.366532
417	Distant	1.09342	0.071882		417	Nearby	0.934498	-0.356547
418	Distant	1.1038	0.075547		418	Nearby	0.934498	-0.356547
419	Distant	1.08279	0.0791812		419	Nearby	0.934498	-0.356547
420	Distant	1.08279	0.0791812		420	Nearby	0.934498	-0.356547
421	Distant	1.08636	0.0791812		421	Nearby	0.944483	-0.356547
422	Distant	1.11727	0.0827854		422	Nearby	0.944483	-0.356547
423	Distant	1.11059	0.0899051		423	Nearby	0.973128	-0.356547
424	Distant	1.09342	0.0934217		424	Nearby	0.977724	-0.356547
425	Distant	1.10721	0.0934217		425	Nearby	0.977724	-0.356547
426	Distant	1.08279	0.09691		426	Nearby	0.977724	-0.356547
427	Distant	1.09691	0.09691		427	Nearby	0.977724	-0.356547
428	Distant	1.1271	0.09691		428	Nearby	0.977724	-0.356547
429	Distant	1.07555	0.100371		429	Nearby	0.977724	-0.356547
430	Distant	1.1271	0.100371		430	Nearby	0.986772	-0.356547
431	Distant	1.10037	0.103804		431	Nearby	0.986772	-0.356547
432	Distant	1.14301	0.103804		432	Nearby	0.959041	-0.346787
433	Distant	1.08279	0.10721		433	Nearby	0.959041	-0.346787
434	Distant	1.09691	0.10721		434	Nearby	0.959041	-0.346787
435	Distant	1.09691	0.10721		435	Nearby	0.959041	-0.346787
436	Distant	1.1038	0.10721		436	Nearby	0.959041	-0.346787
437	Distant	1.1038	0.10721		437	Nearby	0.963788	-0.346787
438	Distant	1.14613	0.10721		438	Nearby	0.977724	-0.346787
439	Distant	1.07555	0.11059		439	Nearby	1.03342	-0.346787
440	Distant	1.09691	0.11059		440	Nearby	0.973128	-0.337242
441	Distant	1.11059	0.11059		441	Nearby	0.954243	-0.327902
442	Distant	1.14922	0.11059		442	Nearby	0.954243	-0.327902
443	Distant	1.10037	0.113943		443	Nearby	0.954243	-0.327902
444	Distant	1.10037	0.117271		444	Nearby	0.954243	-0.327902
445	Distant	1.10037	0.120574		445	Nearby	0.959041	-0.327902
446	Distant	1.10037	0.123852		446	Nearby	0.959041	-0.327902
447	Distant	1.10721	0.123852		447	Nearby	0.959041	-0.327902
448	Distant	1.13672	0.123852		448	Nearby	0.959041	-0.327902
449	Distant	1.13988	0.123852		449	Nearby	0.959041	-0.327902
450	Distant	1.08991	0.127105		450	Nearby	0.959041	-0.327902
451	Distant	1.11394	0.127105		451	Nearby	0.973128	-0.327902
452	Distant	1.11394	0.127105		452	Nearby	0.973128	-0.327902
453	Distant	1.14922	0.127105		453	Nearby	0.973128	-0.327902
454	Distant	1.10721	0.130334		454	Nearby	0.973128	-0.327902
455	Distant	1.11394	0.130334		455	Nearby	1.01284	-0.327902
456	Distant	1.1271	0.130334		456	Nearby	1.01284	-0.327902
457	Distant	1.08636	0.133539		457	Nearby	1.01284	-0.327902
458	Distant	1.09342	0.133539		458	Nearby	1.01284	-0.327902
459	Distant	1.1038	0.133539		459	Nearby	1.02531	-0.327902
460	Distant	1.11727	0.133539		460	Nearby	0.963788	-0.318759
461	Distant	1.13033	0.133539		461	Nearby	0.963788	-0.318759
462	Distant	1.1038	0.136721		462	Nearby	0.977724	-0.318759
463	Distant	1.10721	0.136721		463	Nearby	1	-0.318759
464	Distant	1.11394	0.136721		464	Nearby	1.00432	-0.318759
465	Distant	1.12057	0.136721		465	Nearby	1.07188	-0.318759
466	Distant	1.09691	0.139879		466	Nearby	1.07188	-0.318759
467	Distant	1.10721	0.139879		467	Nearby	0.973128	-0.309804
468	Distant	1.11059	0.139879		468	Nearby	0.973128	-0.309804
469	Distant	1.11727	0.139879		469	Nearby	1.0086	-0.309804
470	Distant	1.11394	0.143015		470	Nearby	1.0086	-0.309804
471	Distant	1.13672	0.143015		471	Nearby	1.0086	-0.309804
472	Distant	1.09691	0.146128		472	Nearby	1.0086	-0.309804
473	Distant	1.10037	0.146128		473	Nearby	0.968483	-0.30103
474	Distant	1.11727	0.146128		474	Nearby	0.977724	-0.30103
475	Distant	1.13672	0.146128		475	Nearby	0.982271	-0.30103
476	Distant	1.09691	0.149219		476	Nearby	0.982271	-0.30103
477	Distant	1.11394	0.149219		477	Nearby	0.982271	-0.30103
478	Distant	1.12057	0.149219		478	Nearby	0.982271	-0.30103
479	Distant	1.12057	0.149219		479	Nearby	0.991226	-0.30103
480	Distant	1.12057	0.149219		480	Nearby	1.0086	-0.30103
481	Distant	1.10721	0.152288		481	Nearby	0.94939	-0.29243
482	Distant	1.11394	0.152288		482	Nearby	0.94939	-0.29243
483	Distant	1.12385	0.152288		483	Nearby	0.94939	-0.29243
484	Distant	1.13033	0.152288		484	Nearby	0.94939	-0.29243
485	Distant	1.08991	0.155336		485	Nearby	0.968483	-0.29243
486	Distant	1.09342	0.155336		486	Nearby	0.982271	-0.29243
487	Distant	1.1038	0.155336		487	Nearby	0.982271	-0.29243
488	Distant	1.13988	0.158362		488	Nearby	0.986772	-0.29243
489	Distant	1.15229	0.164353		489	Nearby	1.0086	-0.29243
490	Distant	1.15229	0.164353		490	Nearby	1.01703	-0.29243
491	Distant	1.12385	0.170262		491	Nearby	0.968483	-0.283997
492	Distant	1.13354	0.170262		492	Nearby	0.986772	-0.283997
493	Distant	1.12385	0.173186		493	Nearby	1	-0.283997
494	Distant	1.11394	0.176091		494	Nearby	1.00432	-0.283997
495	Distant	1.13354	0.176091		495	Nearby	1.01284	-0.275724
496	Distant	1.12057	0.178977		496	Nearby	1.01284	-0.275724
497	Distant	1.12385	0.178977		497	Nearby	1.02938	-0.275724
498	Distant	1.1271	0.178977		498	Nearby	0.982271	-0.267606
499	Distant	1.13033	0.178977		499	Nearby	0.982271	-0.267606
500	Distant	1.13672	0.178977		500	Nearby	0.982271	-0.267606
501	Distant	1.11059	0.181844		501	Nearby	0.982271	-0.267606
502	Distant	1.14301	0.181844		502	Nearby	0.982271	-0.267606
503	Distant	1.10721	0.184691		503	Nearby	0.982271	-0.267606
504	Distant	1.11394	0.184691		504	Nearby	0.982271	-0.267606
505	Distant	1.12385	0.187521		505	Nearby	0.982271	-0.267606
506	Distant	1.16732	0.187521		506	Nearby	0.995635	-0.267606
507	Distant	1.14301	0.190332		507	Nearby	0.973128	-0.259637
508	Distant	1.14301	0.190332		508	Nearby	0.986772	-0.259637
509	Distant	1.14301	0.190332		509	Nearby	0.991226	-0.259637
510	Distant	1.11059	0.193125		510	Nearby	0.973128	-0.251812
511	Distant	1.12385	0.193125		511	Nearby	0.973128	-0.251812
512	Distant	1.13672	0.193125		512	Nearby	0.991226	-0.251812
513	Distant	1.13033	0.1959		513	Nearby	1.01284	-0.251812
514	Distant	1.11059	0.198657		514	Nearby	1.01284	-0.251812
515	Distant	1.12385	0.198657		515	Nearby	1.01284	-0.251812
516	Distant	1.11727	0.20412		516	Nearby	1.01284	-0.251812
517	Distant	1.13033	0.20412		517	Nearby	1.01703	-0.251812
518	Distant	1.12057	0.206826		518	Nearby	0.995635	-0.244125
519	Distant	1.1271	0.206826		519	Nearby	1	-0.244125
520	Distant	1.14301	0.209515		520	Nearby	1	-0.244125
521	Distant	1.14301	0.209515		521	Nearby	1	-0.244125
522	Distant	1.14613	0.209515		522	Nearby	1	-0.244125
523	Distant	1.16435	0.209515		523	Nearby	1.02938	-0.244125
524	Distant	1.16137	0.212188		524	Nearby	1.02938	-0.244125
525	Distant	1.17319	0.212188		525	Nearby	1.02938	-0.244125
526	Distant	1.13354	0.214844		526	Nearby	1.02938	-0.244125
527	Distant	1.14301	0.217484		527	Nearby	0.991226	-0.229148
528	Distant	1.14922	0.217484		528	Nearby	1	-0.221849
529	Distant	1.13033	0.222716		529	Nearby	1	-0.221849
530	Distant	1.13033	0.225309		530	Nearby	1	-0.221849
531	Distant	1.13672	0.225309		531	Nearby	1	-0.221849
532	Distant	1.16137	0.225309		532	Nearby	1.0086	-0.221849
533	Distant	1.11394	0.230449		533	Nearby	1.0607	-0.221849
534	Distant	1.13033	0.230449		534	Nearby	1.08279	-0.221849
535	Distant	1.14613	0.230449		535	Nearby	1.08279	-0.221849
536	Distant	1.14613	0.232996		536	Nearby	1.08279	-0.221849
537	Distant	1.14613	0.232996		537	Nearby	1.08279	-0.221849
538	Distant	1.12057	0.235528		538	Nearby	1.02531	-0.21467
539	Distant	1.13354	0.235528		539	Nearby	1.02531	-0.21467
540	Distant	1.13988	0.235528		540	Nearby	1.03342	-0.21467
541	Distant	1.15229	0.235528		541	Nearby	0.973128	-0.207608
542	Distant	1.16137	0.235528		542	Nearby	0.973128	-0.207608
543	Distant	1.13672	0.238046		543	Nearby	0.973128	-0.207608
544	Distant	1.14922	0.238046		544	Nearby	0.973128	-0.207608
545	Distant	1.13033	0.240549		545	Nearby	1.01284	-0.207608
546	Distant	1.17026	0.240549		546	Nearby	1.01284	-0.207608
547	Distant	1.11727	0.243038		547	Nearby	0.995635	-0.200659
548	Distant	1.14922	0.243038		548	Nearby	0.995635	-0.200659
549	Distant	1.15836	0.243038		549	Nearby	1.0086	-0.200659
550	Distant	1.13988	0.245513		550	Nearby	1.0086	-0.200659
551	Distant	1.15836	0.245513		551	Nearby	1.0086	-0.200659
552	Distant	1.16137	0.245513		552	Nearby	1.0086	-0.200659
553	Distant	1.16435	0.245513		553	Nearby	0.986772	-0.19382
554	Distant	1.14613	0.252853		554	Nearby	1.0086	-0.19382
555	Distant	1.14922	0.252853		555	Nearby	1.03342	-0.19382
556	Distant	1.14922	0.257679		556	Nearby	1	-0.187087
557	Distant	1.13672	0.260071		557	Nearby	1	-0.187087
558	Distant	1.14922	0.260071		558	Nearby	1.01703	-0.187087
559	Distant	1.16137	0.260071		559	Nearby	1.01703	-0.187087
560	Distant	1.13988	0.262451		560	Nearby	1.01703	-0.187087
561	Distant	1.13988	0.267172		561	Nearby	1.01703	-0.187087
562	Distant	1.14301	0.267172		562	Nearby	1.01703	-0.187087
563	Distant	1.15534	0.267172		563	Nearby	1.02531	-0.187087
564	Distant	1.16435	0.267172		564	Nearby	1.02531	-0.187087
565	Distant	1.16732	0.267172		565	Nearby	1.0569	-0.187087
566	Distant	1.16137	0.269513		566	Nearby	1.0607	-0.187087
567	Distant	1.17026	0.271842		567	Nearby	1.00432	-0.180456
568	Distant	1.15534	0.274158		568	Nearby	1.00432	-0.180456
569	Distant	1.15836	0.276462		569	Nearby	1.00432	-0.180456
570	Distant	1.17319	0.278754		570	Nearby	1.02938	-0.180456
571	Distant	1.17319	0.283301		571	Nearby	1.03342	-0.180456
572	Distant	1.16435	0.285557		572	Nearby	1.03743	-0.180456
573	Distant	1.16732	0.285557		573	Nearby	1.03743	-0.180456
574	Distant	1.15229	0.287802		574	Nearby	1.03743	-0.180456
575	Distant	1.15534	0.290035		575	Nearby	1.03743	-0.180456
576	Distant	1.14613	0.292256		576	Nearby	1.04532	-0.180456
577	Distant	1.15836	0.292256		577	Nearby	1.04532	-0.180456
578	Distant	1.16137	0.292256		578	Nearby	1.0086	-0.173925
579	Distant	1.16137	0.292256		579	Nearby	1	-0.167491
580	Distant	1.16732	0.296665		580	Nearby	1	-0.167491
581	Distant	1.14613	0.298853		581	Nearby	1	-0.167491
582	Distant	1.16137	0.298853		582	Nearby	1	-0.167491
583	Distant	1.16137	0.303196		583	Nearby	1.01284	-0.167491
584	Distant	1.15229	0.307496		584	Nearby	1.01284	-0.167491
585	Distant	1.16732	0.307496		585	Nearby	1.01284	-0.167491
586	Distant	1.14922	0.30963		586	Nearby	1.01284	-0.167491
587	Distant	1.15836	0.31597		587	Nearby	1.02938	-0.167491
588	Distant	1.16435	0.318063		588	Nearby	1.03743	-0.167491
589	Distant	1.16435	0.320146		589	Nearby	1.04139	-0.167491
590	Distant	1.16137	0.322219		590	Nearby	1.02119	-0.161151
591	Distant	1.16732	0.32838		591	Nearby	1.02938	-0.161151
592	Distant	1.16732	0.334454		592	Nearby	1.04532	-0.154902
593	Distant	1.17319	0.334454		593	Nearby	1.04532	-0.154902
594	Distant	0.908485	-0.468521		594	Nearby	1.04532	-0.154902
595	Distant	0.908485	-0.443697		595	Nearby	1.04532	-0.154902
596	Distant	0.944483	-0.420216		596	Nearby	1.0086	-0.148742
597	Distant	0.944483	-0.221849		597	Nearby	1.0607	-0.148742
598	Distant	0.94939	-0.309804		598	Nearby	0.995635	-0.142668
599	Distant	0.963788	-0.275724		599	Nearby	1.02119	-0.142668
600	Distant	0.968483	-0.29243		600	Nearby	1.02119	-0.142668
601	Distant	0.973128	-0.200659		601	Nearby	1.02119	-0.142668
602	Distant	0.982271	-0.251812		602	Nearby	1.02119	-0.142668
603	Distant	0.986772	-0.142668		603	Nearby	1.02531	-0.142668
604	Distant	1.0086	-0.119186		604	Nearby	1.02531	-0.142668
605	Distant	1.02119	-0.0861861		605	Nearby	1.02531	-0.142668
606	Distant	1.03342	-0.0362122		606	Nearby	1.02531	-0.142668
607	Distant	1.04139	0.00432137		607	Nearby	1.02938	-0.142668
608	Distant	1.05308	0.0211893		608	Nearby	1.02938	-0.142668
609	Distant	1.0569	0.0334238		609	Nearby	1.04139	-0.142668
610	Distant	1.0607	0.0253059		610	Nearby	1.01284	-0.136677
611	Distant	1.06446	0		611	Nearby	1.01284	-0.136677
612	Distant	1.06819	0.0170333		612	Nearby	1.01284	-0.136677
613	Distant	1.07555	0.075547		613	Nearby	1.01284	-0.136677
614	Distant	1.07555	0.0934217		614	Nearby	1.02531	-0.136677
615	Distant	1.08991	0.0681859		615	Nearby	1.02531	-0.136677
616	Distant	1.1038	0.045323		616	Nearby	1.04139	-0.136677
617	Distant	1.1038	0.133539		617	Nearby	1.04532	-0.136677
618	Distant	1.10721	0.230449		618	Nearby	1.02938	-0.130768
619	Distant	1.11059	0.0934217		619	Nearby	1.04139	-0.130768
620	Distant	1.11727	0.113943		620	Nearby	1.03743	-0.119186
621	Distant	1.11727	0.164353		621	Nearby	1.04139	-0.119186
622	Distant	1.11727	0.1959		622	Nearby	1.01284	-0.113509
623	Distant	1.12057	0.217484		623	Nearby	1.02531	-0.113509
624	Distant	1.12385	0.198657		624	Nearby	1.02531	-0.113509
625	Distant	1.1271	0.25042		625	Nearby	1.02531	-0.113509
626	Distant	1.13354	0.247973		626	Nearby	1.02531	-0.113509
627	Distant	1.13672	0.287802		627	Nearby	1.02531	-0.113509
628	Distant	1.14301	0.133539		628	Nearby	1.03342	-0.113509
629	Distant	1.16137	0.178977		629	Nearby	1.04532	-0.113509
630	Distant	1.17026	0.255273		630	Nearby	1.03342	-0.107905
631	Distant	1.17026	0.380211		631	Nearby	1.03342	-0.107905
632	Distant	0.90309	-0.49485		632	Nearby	1.03342	-0.107905
633	Distant	0.90309	-0.431798		633	Nearby	1.05308	-0.107905
634	Distant	0.908485	-0.455932		634	Nearby	1.08991	-0.102373
635	Distant	0.913814	-0.443697		635	Nearby	1.08991	-0.102373
636	Distant	0.919078	-0.39794		636	Nearby	1.02531	-0.09691
637	Distant	0.919078	-0.39794		637	Nearby	1.04532	-0.09691
638	Distant	0.924279	-0.455932		638	Nearby	1.05308	-0.09691
639	Distant	0.934498	-0.366532		639	Nearby	1.05308	-0.09691
640	Distant	0.94939	-0.356547		640	Nearby	1.0569	-0.09691
641	Distant	0.94939	-0.318759		641	Nearby	1.0569	-0.09691
642	Distant	1.01284	-0.142668		642	Nearby	1.0569	-0.09691
643	Distant	1.01703	-0.113509		643	Nearby	1.0569	-0.09691
644	Distant	1.02531	-0.0757207		644	Nearby	1.05308	-0.091515
645	Distant	1.02938	-0.09691		645	Nearby	1.0569	-0.091515
646	Distant	1.02938	-0.091515		646	Nearby	1.07188	-0.091515
647	Distant	1.03342	-0.0757207		647	Nearby	1.05308	-0.0809219
648	Distant	1.04139	-0.0362122		648	Nearby	1.06446	-0.0809219
649	Distant	1.06446	-0.0268721		649	Nearby	1.07918	-0.0809219
650	Distant	1.08279	0.0413927		650	Nearby	1.04532	-0.0757207
651	Distant	1.08991	0.0128372		651	Nearby	1.04139	-0.0705811
652	Distant	1.11059	0.136721		652	Nearby	1.04922	-0.0655015
653	Distant	1.12385	0.173186		653	Nearby	1.05308	-0.0604807
654	Distant	1.13988	0.294466		654	Nearby	1.07918	-0.0555173
655	Distant	1.15836	0.322219		655	Nearby	1.07918	-0.0555173
656	Distant	1.16137	0.30103		656	Nearby	1.07918	-0.0555173
657	Distant	0.90309	-0.522879		657	Nearby	1.07918	-0.0555173
658	Distant	0.90309	-0.522879		658	Nearby	1.06446	-0.05061
659	Distant	0.90309	-0.481486		659	Nearby	1.07918	-0.05061
660	Distant	0.908485	-0.481486		660	Nearby	1.07918	-0.05061
661	Distant	0.913814	-0.468521		661	Nearby	1.07918	-0.05061
662	Distant	0.913814	-0.455932		662	Nearby	1.07918	-0.05061
663	Distant	0.913814	-0.39794		663	Nearby	1.04532	-0.0457575
664	Distant	0.919078	-0.431798		664	Nearby	1.04532	-0.0457575
665	Distant	0.919078	-0.420216		665	Nearby	1.0607	-0.0457575
666	Distant	0.919078	-0.376751		666	Nearby	1.11727	-0.0457575
667	Distant	0.929419	-0.408935		667	Nearby	1.07918	-0.0409586
668	Distant	0.929419	-0.337242		668	Nearby	1.0569	-0.0315171
669	Distant	0.944483	-0.318759		669	Nearby	1.0569	-0.0315171
670	Distant	0.973128	-0.30103		670	Nearby	1.11059	-0.0315171
671	Distant	0.973128	-0.30103		671	Nearby	1.07188	-0.0268721
672	Distant	1.00432	-0.161151		672	Nearby	1.07555	-0.0268721
673	Distant	1.01284	-0.167491		673	Nearby	1.07555	-0.0268721
674	Distant	1.02531	-0.130768		674	Nearby	1.05308	-0.0222764
675	Distant	1.03743	-0.0555173		675	Nearby	1.0569	-0.0222764
676	Distant	1.04922	-0.0555173		676	Nearby	1.0569	-0.0222764
677	Distant	1.06446	0.0211893		677	Nearby	1.0569	-0.0222764
678	Distant	1.06819	0.0170333		678	Nearby	1.0569	-0.0222764
679	Distant	1.07188	-0.0268721		679	Nearby	1.06446	-0.0222764
680	Distant	1.07918	0.0413927		680	Nearby	1.06446	-0.0222764
681	Distant	1.11394	0.1959		681	Nearby	1.06446	-0.0222764
682	Distant	1.13988	0.176091		682	Nearby	1.06446	-0.0222764
683	Distant	1.13988	0.238046		683	Nearby	1.06819	-0.0222764
684	Distant	1.16732	0.298853		684	Nearby	1.08279	-0.0222764
685	Distant	1.17319	0.30963		685	Nearby	1.10037	-0.0177288
686	Nearby	0.924279	-0.79588		686	Nearby	1.10037	-0.0177288
687	Nearby	0.986772	-0.721246		687	Nearby	1.10037	-0.0177288
688	Nearby	0.908485	-0.657577		688	Nearby	1.10037	-0.0177288
689	Nearby	0.929419	-0.657577		689	Nearby	1.06819	-0.0132283
690	Nearby	0.929419	-0.657577		690	Nearby	1.06819	-0.00877392
691	Nearby	0.90309	-0.638272		691	Nearby	1.06819	-0.00877392
692	Nearby	0.924279	-0.638272		692	Nearby	1.06819	-0.00877392
693	Nearby	0.919078	-0.60206		693	Nearby	1.06819	-0.00877392
694	Nearby	0.919078	-0.60206		694	Nearby	1.08279	-0.00877392
695	Nearby	0.919078	-0.60206		695	Nearby	1.10037	-0.00877392
696	Nearby	0.919078	-0.60206		696	Nearby	1.05308	-0.00436481
697	Nearby	0.929419	-0.60206		697	Nearby	1.08636	-0.00436481
698	Nearby	0.90309	-0.585027		698	Nearby	1.08636	-0.00436481
699	Nearby	0.90309	-0.585027		699	Nearby	1.0607	0
700	Nearby	0.90309	-0.585027		700	Nearby	1.06446	0
701	Nearby	0.90309	-0.585027		701	Nearby	1.07188	0
702	Nearby	0.90309	-0.585027		702	Nearby	1.08636	0
703	Nearby	0.90309	-0.585027		703	Nearby	1.08636	0
704	Nearby	0.90309	-0.585027		704	Nearby	1.08636	0
705	Nearby	0.90309	-0.585027		705	Nearby	1.08636	0
706	Nearby	0.90309	-0.585027		706	Nearby	1.08991	0
707	Nearby	0.90309	-0.585027		707	Nearby	1.08991	0
708	Nearby	0.908485	-0.585027		708	Nearby	1.09691	0
709	Nearby	0.924279	-0.585027		709	Nearby	1.04922	0.00860017
710	Nearby	0.973128	-0.585027		710	Nearby	1.04922	0.00860017
711	Nearby	0.90309	-0.568636		711	Nearby	1.0607	0.00860017
712	Nearby	0.90309	-0.568636		712	Nearby	1.0607	0.00860017
713	Nearby	0.90309	-0.568636		713	Nearby	1.0607	0.00860017
714	Nearby	0.90309	-0.568636		714	Nearby	1.0607	0.00860017
715	Nearby	0.908485	-0.568636		715	Nearby	1.06819	0.0128372
716	Nearby	0.908485	-0.568636		716	Nearby	1.06819	0.0128372
717	Nearby	0.913814	-0.568636		717	Nearby	1.08279	0.0128372
718	Nearby	0.90309	-0.552842		718	Nearby	1.08991	0.0170333
719	Nearby	0.90309	-0.552842		719	Nearby	1.07555	0.0211893
720	Nearby	0.90309	-0.552842		720	Nearby	1.08991	0.0253059
721	Nearby	0.908485	-0.552842		721	Nearby	1.08991	0.0253059
722	Nearby	0.908485	-0.552842		722	Nearby	1.10037	0.0253059
723	Nearby	0.913814	-0.552842		723	Nearby	1.10037	0.0253059
724	Nearby	0.913814	-0.552842		724	Nearby	1.10037	0.0253059
725	Nearby	0.924279	-0.552842		725	Nearby	1.10037	0.0253059
726	Nearby	0.944483	-0.552842		726	Nearby	1.10721	0.0253059
727	Nearby	0.986772	-0.552842		727	Nearby	1.08636	0.0293838
728	Nearby	0.913814	-0.537602		728	Nearby	1.08991	0.0334238
729	Nearby	0.913814	-0.537602		729	Nearby	1.08279	0.0374265
730	Nearby	0.919078	-0.537602		730	Nearby	1.10037	0.0374265
731	Nearby	0.924279	-0.537602		731	Nearby	1.12385	0.0374265
732	Nearby	0.924279	-0.537602		732	Nearby	1.12385	0.0374265
733	Nearby	0.924279	-0.537602		733	Nearby	1.07188	0.0413927
734	Nearby	0.924279	-0.537602		734	Nearby	1.09691	0.0413927
735	Nearby	0.90309	-0.522879		735	Nearby	1.09342	0.045323
736	Nearby	0.90309	-0.522879		736	Nearby	1.11394	0.045323
737	Nearby	0.90309	-0.522879		737	Nearby	1.12057	0.045323
738	Nearby	0.90309	-0.522879		738	Nearby	1.12385	0.045323
739	Nearby	0.90309	-0.522879		739	Nearby	1.07188	0.049218
740	Nearby	0.908485	-0.522879		740	Nearby	1.07188	0.049218
741	Nearby	0.913814	-0.522879		741	Nearby	1.1038	0.049218
742	Nearby	0.919078	-0.522879		742	Nearby	1.10721	0.049218
743	Nearby	0.919078	-0.522879		743	Nearby	1.07555	0.0530784
744	Nearby	0.919078	-0.522879		744	Nearby	1.07555	0.0530784
745	Nearby	0.919078	-0.522879		745	Nearby	1.07918	0.0530784
746	Nearby	0.919078	-0.522879		746	Nearby	1.09691	0.0681859
747	Nearby	0.919078	-0.522879		747	Nearby	1.08991	0.071882
748	Nearby	0.919078	-0.522879		748	Nearby	1.09342	0.071882
749	Nearby	0.919078	-0.522879		749	Nearby	1.1038	0.071882
750	Nearby	0.919078	-0.522879		750	Nearby	1.1038	0.071882
751	Nearby	0.919078	-0.522879		751	Nearby	1.1038	0.071882
752	Nearby	0.924279	-0.522879		752	Nearby	1.1038	0.071882
753	Nearby	0.924279	-0.522879		753	Nearby	1.08991	0.075547
754	Nearby	0.939519	-0.522879		754	Nearby	1.08991	0.075547
755	Nearby	0.944483	-0.522879		755	Nearby	1.07918	0.0827854
756	Nearby	0.973128	-0.522879		756	Nearby	1.10721	0.0827854
757	Nearby	0.90309	-0.508638		757	Nearby	1.10721	0.0827854
758	Nearby	0.90309	-0.508638		758	Nearby	1.10721	0.0827854
759	Nearby	0.908485	-0.508638		759	Nearby	1.10721	0.0827854
760	Nearby	0.908485	-0.508638		760	Nearby	1.09342	0.0863598
761	Nearby	0.908485	-0.508638		761	Nearby	1.10037	0.0863598
762	Nearby	0.919078	-0.508638		762	Nearby	1.10721	0.0899051
763	Nearby	0.924279	-0.508638		763	Nearby	1.11727	0.0899051
764	Nearby	0.924279	-0.508638		764	Nearby	1.11727	0.0899051
765	Nearby	0.924279	-0.508638		765	Nearby	1.11059	0.0934217
766	Nearby	0.924279	-0.508638		766	Nearby	1.11059	0.0934217
767	Nearby	0.944483	-0.508638		767	Nearby	1.08991	0.100371
768	Nearby	0.944483	-0.508638		768	Nearby	1.08991	0.100371
769	Nearby	0.954243	-0.508638		769	Nearby	1.11059	0.100371
770	Nearby	0.908485	-0.49485		770	Nearby	1.11059	0.100371
771	Nearby	0.908485	-0.49485		771	Nearby	1.09342	0.10721
772	Nearby	0.913814	-0.49485		772	Nearby	1.12385	0.10721
773	Nearby	0.919078	-0.49485		773	Nearby	1.13033	0.10721
774	Nearby	0.919078	-0.49485		774	Nearby	1.13033	0.10721
775	Nearby	0.919078	-0.49485		775	Nearby	1.1038	0.113943
776	Nearby	0.919078	-0.49485		776	Nearby	1.1038	0.113943
777	Nearby	0.919078	-0.49485		777	Nearby	1.1038	0.113943
778	Nearby	0.919078	-0.49485		778	Nearby	1.13354	0.113943
779	Nearby	0.929419	-0.49485		779	Nearby	1.12385	0.117271
780	Nearby	0.94939	-0.49485		780	Nearby	1.08991	0.120574
781	Nearby	0.94939	-0.49485		781	Nearby	1.11059	0.123852
782	Nearby	0.94939	-0.49485		782	Nearby	1.11727	0.123852
783	Nearby	0.94939	-0.49485		783	Nearby	1.10037	0.127105
784	Nearby	0.968483	-0.49485		784	Nearby	1.13672	0.127105
785	Nearby	0.982271	-0.49485		785	Nearby	1.11727	0.130334
786	Nearby	0.908485	-0.481486		786	Nearby	1.11727	0.130334
787	Nearby	0.908485	-0.481486		787	Nearby	1.15534	0.130334
788	Nearby	0.913814	-0.481486		788	Nearby	1.11059	0.136721
789	Nearby	0.913814	-0.481486		789	Nearby	1.11727	0.136721
790	Nearby	0.913814	-0.481486		790	Nearby	1.12385	0.139879
791	Nearby	0.913814	-0.481486		791	Nearby	1.10721	0.143015
792	Nearby	0.934498	-0.481486		792	Nearby	1.12057	0.143015
793	Nearby	0.934498	-0.481486		793	Nearby	1.13988	0.146128
794	Nearby	0.939519	-0.481486		794	Nearby	1.13988	0.146128
795	Nearby	0.939519	-0.481486		795	Nearby	1.1038	0.149219
796	Nearby	0.944483	-0.481486		796	Nearby	1.12057	0.149219
797	Nearby	0.944483	-0.481486		797	Nearby	1.15534	0.149219
798	Nearby	0.954243	-0.481486		798	Nearby	1.15534	0.149219
799	Nearby	0.954243	-0.481486		799	Nearby	1.15534	0.149219
800	Nearby	0.963788	-0.481486		800	Nearby	1.10037	0.158362
801	Nearby	0.913814	-0.468521		801	Nearby	1.13033	0.158362
802	Nearby	0.919078	-0.468521		802	Nearby	1.14922	0.158362
803	Nearby	0.929419	-0.468521		803	Nearby	1.14922	0.158362
804	Nearby	0.929419	-0.468521		804	Nearby	1.14922	0.158362
805	Nearby	0.929419	-0.468521		805	Nearby	1.14922	0.158362
806	Nearby	0.929419	-0.468521		806	Nearby	1.12385	0.161368
807	Nearby	0.934498	-0.468521		807	Nearby	1.1271	0.161368
808	Nearby	0.934498	-0.468521		808	Nearby	1.1271	0.161368
809	Nearby	0.934498	-0.468521		809	Nearby	1.12385	0.173186
810	Nearby	0.939519	-0.468521		810	Nearby	1.12385	0.173186
811	Nearby	0.939519	-0.468521		811	Nearby	1.12057	0.176091
812	Nearby	0.939519	-0.468521		812	Nearby	1.15534	0.184691
813	Nearby	0.939519	-0.468521		813	Nearby	1.15534	0.184691
814	Nearby	0.944483	-0.468521		814	Nearby	1.15534	0.184691
815	Nearby	0.959041	-0.468521		815	Nearby	1.15534	0.184691
816	Nearby	0.973128	-0.468521		816	Nearby	1.16732	0.184691
817	Nearby	0.913814	-0.455932		817	Nearby	1.16732	0.184691
818	Nearby	0.919078	-0.455932		818	Nearby	1.16732	0.184691
819	Nearby	0.924279	-0.455932		819	Nearby	1.16732	0.184691
820	Nearby	0.929419	-0.455932		820	Nearby	1.14922	0.187521
821	Nearby	0.929419	-0.455932		821	Nearby	1.15229	0.190332
822	Nearby	0.939519	-0.455932		822	Nearby	1.13988	0.193125
823	Nearby	0.944483	-0.455932		823	Nearby	1.14301	0.193125
824	Nearby	0.944483	-0.455932		824	Nearby	1.16137	0.193125
825	Nearby	0.944483	-0.455932		825	Nearby	1.16732	0.1959
826	Nearby	0.944483	-0.455932		826	Nearby	1.17026	0.1959
827	Nearby	0.954243	-0.455932		827	Nearby	1.17026	0.1959
828	Nearby	0.959041	-0.455932		828	Nearby	1.17026	0.1959
829	Nearby	0.991226	-0.455932		829	Nearby	1.17026	0.1959
830	Nearby	0.991226	-0.455932		830	Nearby	1.15836	0.198657
831	Nearby	0.924279	-0.443697		831	Nearby	1.12057	0.201397
832	Nearby	0.924279	-0.443697		832	Nearby	1.14301	0.201397
833	Nearby	0.924279	-0.443697		833	Nearby	1.15229	0.201397
834	Nearby	0.934498	-0.443697		834	Nearby	1.16137	0.201397
835	Nearby	0.934498	-0.443697		835	Nearby	1.13354	0.20412
836	Nearby	0.934498	-0.443697		836	Nearby	1.13988	0.206826
837	Nearby	0.934498	-0.443697		837	Nearby	1.16137	0.212188
838	Nearby	0.934498	-0.443697		838	Nearby	1.16137	0.212188
839	Nearby	0.939519	-0.443697		839	Nearby	1.16137	0.212188
840	Nearby	0.944483	-0.443697		840	Nearby	1.16137	0.212188
841	Nearby	0.944483	-0.443697		841	Nearby	1.15836	0.214844
842	Nearby	0.944483	-0.443697		842	Nearby	1.15836	0.214844
843	Nearby	0.94939	-0.443697		843	Nearby	1.15836	0.214844
844	Nearby	0.94939	-0.443697		844	Nearby	1.15836	0.214844
845	Nearby	0.954243	-0.443697		845	Nearby	1.13672	0.217484
846	Nearby	0.963788	-0.443697		846	Nearby	1.14301	0.220108
847	Nearby	0.963788	-0.443697		847	Nearby	1.15229	0.220108
848	Nearby	0.963788	-0.443697		848	Nearby	1.14922	0.225309
849	Nearby	0.963788	-0.443697		849	Nearby	1.13033	0.230449
850	Nearby	0.963788	-0.443697		850	Nearby	1.13988	0.230449
851	Nearby	0.913814	-0.431798		851	Nearby	1.13988	0.230449
852	Nearby	0.913814	-0.431798		852	Nearby	1.13988	0.230449
853	Nearby	0.913814	-0.431798		853	Nearby	1.13988	0.230449
854	Nearby	0.934498	-0.431798		854	Nearby	1.15534	0.230449
855	Nearby	0.934498	-0.431798		855	Nearby	1.14301	0.232996
856	Nearby	0.954243	-0.431798		856	Nearby	1.14922	0.232996
857	Nearby	0.954243	-0.431798		857	Nearby	1.15534	0.235528
858	Nearby	0.954243	-0.431798		858	Nearby	1.15534	0.235528
859	Nearby	0.954243	-0.431798		859	Nearby	1.15534	0.235528
860	Nearby	0.954243	-0.431798		860	Nearby	1.15534	0.235528
861	Nearby	0.991226	-0.431798		861	Nearby	1.14301	0.240549
862	Nearby	0.929419	-0.420216		862	Nearby	1.14301	0.240549
863	Nearby	0.934498	-0.420216		863	Nearby	1.14301	0.240549
864	Nearby	0.934498	-0.420216		864	Nearby	1.14301	0.240549
865	Nearby	0.939519	-0.420216		865	Nearby	1.15534	0.240549
866	Nearby	0.939519	-0.420216		866	Nearby	1.15534	0.243038
867	Nearby	0.939519	-0.420216		867	Nearby	1.13354	0.245513
868	Nearby	0.944483	-0.420216		868	Nearby	1.13354	0.245513
869	Nearby	0.944483	-0.420216		869	Nearby	1.14922	0.247973
870	Nearby	0.944483	-0.420216		870	Nearby	1.13988	0.25042
871	Nearby	0.944483	-0.420216		871	Nearby	1.15229	0.25042
872	Nearby	0.94939	-0.420216		872	Nearby	1.15229	0.257679
873	Nearby	0.954243	-0.420216		873	Nearby	1.15229	0.257679
874	Nearby	0.963788	-0.420216		874	Nearby	1.16732	0.267172
875	Nearby	0.968483	-0.420216		875	Nearby	1.16732	0.274158
876	Nearby	0.968483	-0.420216		876	Nearby	1.16732	0.274158
877	Nearby	0.968483	-0.420216		877	Nearby	1.16732	0.274158
878	Nearby	0.968483	-0.420216		878	Nearby	1.16732	0.274158
879	Nearby	0.977724	-0.420216		879	Nearby	1.17026	0.278754
880	Nearby	1	-0.420216		880	Nearby	1.13672	0.290035
881	Nearby	1.02119	-0.420216		881	Nearby	1.15229	0.30103
882	Nearby	0.908485	-0.408935		882	Nearby	1.15229	0.30103
883	Nearby	0.908485	-0.408935		883	Nearby	1.15229	0.30103
884	Nearby	0.913814	-0.408935		884	Nearby	1.15229	0.30103
885	Nearby	0.924279	-0.408935		885	Nearby	1.15836	0.311754
886	Nearby	0.924279	-0.408935		886	Nearby	1.15836	0.311754
887	Nearby	0.94939	-0.408935		887	Nearby	1.15836	0.311754
888	Nearby	0.94939	-0.408935		888	Nearby	1.15836	0.311754
889	Nearby	0.94939	-0.408935		889	Nearby	1.16137	0.311754
890	Nearby	0.94939	-0.408935		890	Nearby	1.15534	0.32838
891	Nearby	0.94939	-0.408935		891	Nearby	1.15534	0.32838
892	Nearby	0.959041	-0.408935		892	Nearby	1.15534	0.32838
893	Nearby	0.959041	-0.408935		893	Nearby	1.15534	0.32838
894	Nearby	0.959041	-0.408935		894	Nearby	1.17319	0.344392
895	Nearby	0.959041	-0.408935		895	Nearby	1.17319	0.344392
896	Nearby	0.959041	-0.408935		896	Nearby	1.17319	0.385606
897	Nearby	0.963788	-0.408935		897	Nearby	1.17319	0.385606
898	Nearby	0.963788	-0.408935		898	Nearby	0.919078	-0.236572
899	Nearby	0.963788	-0.408935		899	Nearby	0.939519	-0.283997
900	Nearby	0.968483	-0.408935		900	Nearby	0.968483	-0.259637
901	Nearby	0.968483	-0.408935		901	Nearby	0.986772	-0.124939
902	Nearby	0.986772	-0.408935		902	Nearby	1.02119	-0.0362122
903	Nearby	0.913814	-0.39794		903	Nearby	1.04139	-0.0177288
904	Nearby	0.94939	-0.39794		904	Nearby	1.04532	0.0293838
905	Nearby	0.94939	-0.39794		905	Nearby	1.07188	0.0530784
906	Nearby	0.963788	-0.39794		906	Nearby	1.08279	0.117271
907	Nearby	0.968483	-0.39794		907	Nearby	0.939519	-0.537602
908	Nearby	0.977724	-0.39794		908	Nearby	1.01284	-0.187087
909	Nearby	0.982271	-0.39794		909	Nearby	1.02531	-0.0861861
910	Nearby	1.01284	-0.39794		910	Nearby	1.07555	0.045323
911	Nearby	0.934498	-0.387216		911	Nearby	1.08636	-0.200659
912	Nearby	0.963788	-0.387216		912	Nearby	1.09342	0.103804
913	Nearby	0.963788	-0.387216		913	Nearby	1.09342	0.130334
914	Nearby	0.963788	-0.387216		914	Nearby	1.12385	0.1959
915	Nearby	0.963788	-0.387216		915	Nearby	1.13672	0.257679
916	Nearby	0.963788	-0.387216		916	Nearby	1.13988	0.305351
917	Nearby	0.963788	-0.387216		917	Nearby	1.15836	0.123852
918	Nearby	0.963788	-0.387216		918	Nearby	1.17319	0.146128
919	Nearby	0.963788	-0.387216		919	Nearby	0.913814	-0.455932
920	Nearby	0.977724	-0.387216		920	Nearby	0.924279	-0.481486
921	Nearby	0.929419	-0.376751		921	Nearby	0.924279	-0.481486
922	Nearby	0.929419	-0.376751		922	Nearby	0.929419	-0.443697
923	Nearby	0.939519	-0.376751		923	Nearby	0.939519	-0.420216
924	Nearby	0.959041	-0.376751		924	Nearby	0.939519	-0.408935
925	Nearby	0.963788	-0.376751		925	Nearby	0.939519	-0.39794
926	Nearby	0.968483	-0.376751		926	Nearby	0.944483	-0.39794
927	Nearby	0.982271	-0.376751		927	Nearby	0.954243	-0.455932
928	Nearby	0.982271	-0.376751		928	Nearby	0.954243	-0.356547
929	Nearby	0.986772	-0.376751		929	Nearby	0.959041	-0.408935
930	Nearby	1	-0.376751		930	Nearby	0.963788	-0.39794
931	Nearby	0.934498	-0.366532		931	Nearby	0.968483	-0.327902
932	Nearby	0.954243	-0.366532		932	Nearby	0.977724	-0.318759
933	Nearby	0.954243	-0.366532		933	Nearby	1.0086	-0.200659
934	Nearby	0.954243	-0.366532		934	Nearby	1.01284	-0.187087
935	Nearby	0.954243	-0.366532		935	Nearby	1.03743	-0.0604807
936	Nearby	0.959041	-0.366532		936	Nearby	1.04532	-0.0222764
937	Nearby	0.968483	-0.366532		937	Nearby	1.04922	-0.0757207
938	Nearby	0.968483	-0.366532		938	Nearby	1.05308	-0.167491
939	Nearby	0.968483	-0.366532		939	Nearby	1.07918	0.064458
940	Nearby	0.986772	-0.366532		940	Nearby	1.08279	0.103804
941	Nearby	1.00432	-0.366532		941	Nearby	1.09691	0.09691
942	Nearby	0.959041	-0.356547		942	Nearby	1.10037	0.103804
943	Nearby	0.968483	-0.356547		943	Nearby	1.11394	-0.0177288
944	Nearby	0.982271	-0.356547		944	Nearby	1.16435	0.232996
945	Nearby	0.982271	-0.356547
946	Nearby	0.982271	-0.356547
947	Nearby	0.991226	-0.356547
948	Nearby	0.991226	-0.356547
949	Nearby	1	-0.356547
950	Nearby	1.0086	-0.356547
951	Nearby	0.939519	-0.346787
952	Nearby	0.959041	-0.346787
953	Nearby	0.963788	-0.346787
954	Nearby	0.963788	-0.346787
955	Nearby	0.963788	-0.346787
956	Nearby	0.963788	-0.346787
957	Nearby	0.968483	-0.346787
958	Nearby	0.968483	-0.346787
959	Nearby	0.968483	-0.346787
960	Nearby	0.968483	-0.346787
961	Nearby	0.973128	-0.346787
962	Nearby	0.977724	-0.346787
963	Nearby	0.982271	-0.346787
964	Nearby	0.982271	-0.346787
965	Nearby	1.00432	-0.346787
966	Nearby	1.0086	-0.346787
967	Nearby	1.02938	-0.346787
968	Nearby	0.954243	-0.337242
969	Nearby	0.954243	-0.337242
970	Nearby	0.959041	-0.337242
971	Nearby	0.959041	-0.337242
972	Nearby	0.959041	-0.337242
973	Nearby	0.959041	-0.337242
974	Nearby	0.959041	-0.337242
975	Nearby	0.959041	-0.337242
976	Nearby	0.963788	-0.337242
977	Nearby	0.963788	-0.337242
978	Nearby	0.968483	-0.337242
979	Nearby	0.968483	-0.337242
980	Nearby	0.973128	-0.337242
981	Nearby	0.973128	-0.337242
982	Nearby	0.973128	-0.337242
983	Nearby	0.977724	-0.337242
984	Nearby	0.995635	-0.337242
985	Nearby	0.995635	-0.337242
986	Nearby	0.995635	-0.337242
987	Nearby	1.02119	-0.337242
988	Nearby	1.02119	-0.337242
989	Nearby	1.02119	-0.337242
990	Nearby	0.954243	-0.327902
991	Nearby	0.954243	-0.327902
992	Nearby	0.954243	-0.327902
993	Nearby	0.954243	-0.327902
994	Nearby	0.968483	-0.327902
995	Nearby	0.968483	-0.327902
996	Nearby	0.986772	-0.327902
997	Nearby	0.991226	-0.327902
998	Nearby	0.991226	-0.327902
999	Nearby	1	-0.327902
1000	Nearby	1	-0.327902
1001	Nearby	1	-0.327902
1002	Nearby	1	-0.327902
1003	Nearby	1.01284	-0.327902
1004	Nearby	1.03342	-0.327902
1005	Nearby	0.94939	-0.318759
1006	Nearby	0.94939	-0.318759
1007	Nearby	0.94939	-0.318759
1008	Nearby	0.94939	-0.318759
1009	Nearby	0.94939	-0.318759
1010	Nearby	0.94939	-0.318759
1011	Nearby	0.954243	-0.318759
1012	Nearby	0.954243	-0.318759
1013	Nearby	0.963788	-0.318759
1014	Nearby	0.973128	-0.318759
1015	Nearby	0.973128	-0.318759
1016	Nearby	0.973128	-0.318759
1017	Nearby	0.973128	-0.318759
1018	Nearby	0.977724	-0.318759
1019	Nearby	0.986772	-0.318759
1020	Nearby	0.986772	-0.318759
1021	Nearby	0.986772	-0.318759
1022	Nearby	0.991226	-0.318759
1023	Nearby	0.991226	-0.318759
1024	Nearby	1.00432	-0.318759
1025	Nearby	1.00432	-0.318759
1026	Nearby	1.01703	-0.318759
1027	Nearby	1.02119	-0.318759
1028	Nearby	1.06819	-0.318759
1029	Nearby	0.963788	-0.309804
1030	Nearby	0.963788	-0.309804
1031	Nearby	0.968483	-0.309804
1032	Nearby	0.973128	-0.309804
1033	Nearby	0.973128	-0.309804
1034	Nearby	0.977724	-0.309804
1035	Nearby	0.982271	-0.309804
1036	Nearby	0.982271	-0.309804
1037	Nearby	0.982271	-0.309804
1038	Nearby	0.991226	-0.309804
1039	Nearby	0.991226	-0.309804
1040	Nearby	0.995635	-0.309804
1041	Nearby	1	-0.309804
1042	Nearby	1.01284	-0.309804
1043	Nearby	0.973128	-0.30103
1044	Nearby	0.973128	-0.30103
1045	Nearby	0.973128	-0.30103
1046	Nearby	0.973128	-0.30103
1047	Nearby	0.977724	-0.30103
1048	Nearby	0.977724	-0.30103
1049	Nearby	0.977724	-0.30103
1050	Nearby	0.977724	-0.30103
1051	Nearby	0.977724	-0.30103
1052	Nearby	0.977724	-0.30103
1053	Nearby	0.977724	-0.30103
1054	Nearby	0.982271	-0.30103
1055	Nearby	0.991226	-0.30103
1056	Nearby	0.991226	-0.30103
1057	Nearby	0.991226	-0.30103
1058	Nearby	0.991226	-0.30103
1059	Nearby	0.995635	-0.30103
1060	Nearby	0.995635	-0.30103
1061	Nearby	1	-0.30103
1062	Nearby	1.00432	-0.30103
1063	Nearby	1.00432	-0.30103
1064	Nearby	1.0086	-0.30103
1065	Nearby	1.0086	-0.30103
1066	Nearby	0.963788	-0.29243
1067	Nearby	0.963788	-0.29243
1068	Nearby	0.973128	-0.29243
1069	Nearby	0.973128	-0.29243
1070	Nearby	0.973128	-0.29243
1071	Nearby	0.973128	-0.29243
1072	Nearby	0.973128	-0.29243
1073	Nearby	0.982271	-0.29243
1074	Nearby	0.986772	-0.29243
1075	Nearby	0.986772	-0.29243
1076	Nearby	0.986772	-0.29243
1077	Nearby	0.986772	-0.29243
1078	Nearby	0.986772	-0.29243
1079	Nearby	0.986772	-0.29243
1080	Nearby	0.991226	-0.29243
1081	Nearby	0.995635	-0.29243
1082	Nearby	1	-0.29243
1083	Nearby	1	-0.29243
1084	Nearby	1	-0.29243
1085	Nearby	1	-0.29243
1086	Nearby	1	-0.29243
1087	Nearby	1.01703	-0.29243
1088	Nearby	1.01703	-0.29243
1089	Nearby	1.01703	-0.29243
1090	Nearby	1.02938	-0.29243
1091	Nearby	0.973128	-0.283997
1092	Nearby	0.982271	-0.283997
1093	Nearby	0.986772	-0.283997
1094	Nearby	0.986772	-0.283997
1095	Nearby	0.986772	-0.283997
1096	Nearby	0.991226	-0.283997
1097	Nearby	0.991226	-0.283997
1098	Nearby	0.995635	-0.283997
1099	Nearby	0.995635	-0.283997
1100	Nearby	1.0086	-0.283997
1101	Nearby	1.01284	-0.283997
1102	Nearby	1.01284	-0.283997
1103	Nearby	1.03342	-0.283997
1104	Nearby	1.03342	-0.283997
1105	Nearby	0.968483	-0.275724
1106	Nearby	0.968483	-0.275724
1107	Nearby	0.982271	-0.275724
1108	Nearby	0.991226	-0.275724
1109	Nearby	0.995635	-0.275724
1110	Nearby	0.995635	-0.275724
1111	Nearby	0.995635	-0.275724
1112	Nearby	1.00432	-0.275724
1113	Nearby	1.00432	-0.275724
1114	Nearby	1.00432	-0.275724
1115	Nearby	1.00432	-0.275724
1116	Nearby	1.00432	-0.275724
1117	Nearby	1.00432	-0.275724
1118	Nearby	1.00432	-0.275724
1119	Nearby	1.02119	-0.275724
1120	Nearby	1.02119	-0.275724
1121	Nearby	1.02119	-0.275724
1122	Nearby	1.02119	-0.275724
1123	Nearby	1.03342	-0.275724
1124	Nearby	0.977724	-0.267606
1125	Nearby	0.986772	-0.267606
1126	Nearby	0.986772	-0.267606
1127	Nearby	0.991226	-0.267606
1128	Nearby	0.991226	-0.267606
1129	Nearby	0.991226	-0.267606
1130	Nearby	0.991226	-0.267606
1131	Nearby	0.991226	-0.267606
1132	Nearby	0.995635	-0.267606
1133	Nearby	0.995635	-0.267606
1134	Nearby	1.00432	-0.267606
1135	Nearby	1.0086	-0.267606
1136	Nearby	1.02531	-0.267606
1137	Nearby	0.982271	-0.259637
1138	Nearby	0.982271	-0.259637
1139	Nearby	0.982271	-0.259637
1140	Nearby	0.986772	-0.259637
1141	Nearby	0.986772	-0.259637
1142	Nearby	0.995635	-0.259637
1143	Nearby	0.995635	-0.259637
1144	Nearby	0.995635	-0.259637
1145	Nearby	1	-0.259637
1146	Nearby	1	-0.259637
1147	Nearby	1.00432	-0.259637
1148	Nearby	1.0086	-0.259637
1149	Nearby	1.01284	-0.259637
1150	Nearby	1.01284	-0.259637
1151	Nearby	1.01703	-0.259637
1152	Nearby	1.02119	-0.259637
1153	Nearby	1.03342	-0.259637
1154	Nearby	0.986772	-0.251812
1155	Nearby	0.986772	-0.251812
1156	Nearby	0.986772	-0.251812
1157	Nearby	0.986772	-0.251812
1158	Nearby	0.991226	-0.251812
1159	Nearby	0.991226	-0.251812
1160	Nearby	0.991226	-0.251812
1161	Nearby	0.991226	-0.251812
1162	Nearby	0.991226	-0.251812
1163	Nearby	1.00432	-0.251812
1164	Nearby	1.00432	-0.251812
1165	Nearby	1.00432	-0.251812
1166	Nearby	1.0086	-0.251812
1167	Nearby	1.0086	-0.251812
1168	Nearby	1.02119	-0.251812
1169	Nearby	1.02938	-0.251812
1170	Nearby	1.02938	-0.251812
1171	Nearby	1.02938	-0.251812
1172	Nearby	1.02938	-0.251812
1173	Nearby	1.02938	-0.251812
1174	Nearby	1.03342	-0.251812
1175	Nearby	1.04922	-0.251812
1176	Nearby	0.977724	-0.244125
1177	Nearby	0.977724	-0.244125
1178	Nearby	0.982271	-0.244125
1179	Nearby	0.982271	-0.244125
1180	Nearby	0.982271	-0.244125
1181	Nearby	0.991226	-0.244125
1182	Nearby	0.991226	-0.244125
1183	Nearby	0.991226	-0.244125
1184	Nearby	1	-0.244125
1185	Nearby	1	-0.244125
1186	Nearby	1.00432	-0.244125
1187	Nearby	1.00432	-0.244125
1188	Nearby	1.00432	-0.244125
1189	Nearby	1.00432	-0.244125
1190	Nearby	1.00432	-0.244125
1191	Nearby	1.00432	-0.244125
1192	Nearby	1.00432	-0.244125
1193	Nearby	1.00432	-0.244125
1194	Nearby	1.00432	-0.244125
1195	Nearby	1.00432	-0.244125
1196	Nearby	1.0086	-0.244125
1197	Nearby	1.0086	-0.244125
1198	Nearby	1.04139	-0.244125
1199	Nearby	0.991226	-0.236572
1200	Nearby	0.995635	-0.236572
1201	Nearby	0.995635	-0.236572
1202	Nearby	0.995635	-0.236572
1203	Nearby	0.995635	-0.236572
1204	Nearby	0.995635	-0.236572
1205	Nearby	1	-0.236572
1206	Nearby	1	-0.236572
1207	Nearby	1.00432	-0.236572
1208	Nearby	1.00432	-0.236572
1209	Nearby	1.0086	-0.236572
1210	Nearby	1.01284	-0.236572
1211	Nearby	1.01703	-0.236572
1212	Nearby	1.02119	-0.236572
1213	Nearby	1.02531	-0.236572
1214	Nearby	1.02531	-0.236572
1215	Nearby	1.02938	-0.236572
1216	Nearby	1.03743	-0.236572
1217	Nearby	0.991226	-0.229148
1218	Nearby	1	-0.229148
1219	Nearby	1	-0.229148
1220	Nearby	1.0086	-0.229148
1221	Nearby	1.0086	-0.229148
1222	Nearby	1.0086	-0.229148
1223	Nearby	1.0086	-0.229148
1224	Nearby	1.0086	-0.229148
1225	Nearby	1.0086	-0.229148
1226	Nearby	1.0086	-0.229148
1227	Nearby	1.0086	-0.229148
1228	Nearby	1.0086	-0.229148
1229	Nearby	1.01284	-0.229148
1230	Nearby	1.01284	-0.229148
1231	Nearby	1.02119	-0.229148
1232	Nearby	0.954243	-0.221849
1233	Nearby	0.977724	-0.221849
1234	Nearby	0.991226	-0.221849
1235	Nearby	0.991226	-0.221849
1236	Nearby	0.991226	-0.221849
1237	Nearby	0.995635	-0.221849
1238	Nearby	1	-0.221849
1239	Nearby	1.0086	-0.221849
1240	Nearby	1.0086	-0.221849
1241	Nearby	1.01703	-0.221849
1242	Nearby	1.0569	-0.221849
1243	Nearby	0.991226	-0.21467
1244	Nearby	0.991226	-0.21467
1245	Nearby	0.995635	-0.21467
1246	Nearby	1.0086	-0.21467
1247	Nearby	1.0086	-0.21467
1248	Nearby	1.01284	-0.21467
1249	Nearby	1.01284	-0.21467
1250	Nearby	1.01284	-0.21467
1251	Nearby	1.01284	-0.21467
1252	Nearby	1.01284	-0.21467
1253	Nearby	1.01284	-0.21467
1254	Nearby	1.01284	-0.21467
1255	Nearby	1.01284	-0.21467
1256	Nearby	1.01703	-0.21467
1257	Nearby	1.02119	-0.21467
1258	Nearby	1.02119	-0.21467
1259	Nearby	1.02531	-0.21467
1260	Nearby	1.02938	-0.21467
1261	Nearby	0.995635	-0.207608
1262	Nearby	1.01284	-0.207608
1263	Nearby	1.01284	-0.207608
1264	Nearby	1.01284	-0.207608
1265	Nearby	1.01284	-0.207608
1266	Nearby	1.01703	-0.207608
1267	Nearby	1.01703	-0.207608
1268	Nearby	1.01703	-0.207608
1269	Nearby	1.01703	-0.207608
1270	Nearby	1.02119	-0.207608
1271	Nearby	1.02119	-0.207608
1272	Nearby	1.02119	-0.207608
1273	Nearby	1.02938	-0.207608
1274	Nearby	1.03743	-0.207608
1275	Nearby	0.995635	-0.200659
1276	Nearby	1.0086	-0.200659
1277	Nearby	1.02119	-0.200659
1278	Nearby	1.02938	-0.200659
1279	Nearby	1.03342	-0.200659
1280	Nearby	1.03342	-0.200659
1281	Nearby	1.03342	-0.200659
1282	Nearby	1.03342	-0.200659
1283	Nearby	1.00432	-0.19382
1284	Nearby	1.00432	-0.19382
1285	Nearby	1.01284	-0.19382
1286	Nearby	1.01284	-0.19382
1287	Nearby	1.02119	-0.19382
1288	Nearby	1.02119	-0.19382
1289	Nearby	1.02938	-0.19382
1290	Nearby	1.04139	-0.19382
1291	Nearby	1.04922	-0.19382
1292	Nearby	1.04922	-0.19382
1293	Nearby	1.01703	-0.187087
1294	Nearby	1.01703	-0.187087
1295	Nearby	1.02119	-0.187087
1296	Nearby	1.02119	-0.187087
1297	Nearby	1.02938	-0.187087
1298	Nearby	1.03342	-0.187087
1299	Nearby	1.03743	-0.187087
1300	Nearby	1.03743	-0.187087
1301	Nearby	1.03743	-0.187087
1302	Nearby	1.03743	-0.187087
1303	Nearby	1.04532	-0.187087
1304	Nearby	1.04532	-0.187087
1305	Nearby	1.0569	-0.187087
1306	Nearby	1.0569	-0.187087
1307	Nearby	1.0569	-0.187087
1308	Nearby	1.0569	-0.187087
1309	Nearby	1.01284	-0.180456
1310	Nearby	1.01284	-0.180456
1311	Nearby	1.01284	-0.180456
1312	Nearby	1.02119	-0.180456
1313	Nearby	1.02119	-0.180456
1314	Nearby	1.04139	-0.180456
1315	Nearby	1.04532	-0.180456
1316	Nearby	1.04922	-0.180456
1317	Nearby	1.0086	-0.173925
1318	Nearby	1.02531	-0.173925
1319	Nearby	1.02531	-0.173925
1320	Nearby	1.03342	-0.173925
1321	Nearby	1.03342	-0.173925
1322	Nearby	1.03342	-0.173925
1323	Nearby	1.05308	-0.173925
1324	Nearby	1.05308	-0.173925
1325	Nearby	1.05308	-0.173925
1326	Nearby	1	-0.167491
1327	Nearby	1	-0.167491
1328	Nearby	1	-0.167491
1329	Nearby	1	-0.167491
1330	Nearby	1.02938	-0.167491
1331	Nearby	1.02938	-0.167491
1332	Nearby	1.03342	-0.167491
1333	Nearby	1.03342	-0.167491
1334	Nearby	1.03342	-0.167491
1335	Nearby	1.03342	-0.167491
1336	Nearby	1.03743	-0.167491
1337	Nearby	1.04532	-0.167491
1338	Nearby	1.0569	-0.167491
1339	Nearby	1	-0.161151
1340	Nearby	1.01703	-0.161151
1341	Nearby	1.01703	-0.161151
1342	Nearby	1.02119	-0.161151
1343	Nearby	1.02119	-0.161151
1344	Nearby	1.03743	-0.161151
1345	Nearby	1.04922	-0.161151
1346	Nearby	1.0569	-0.161151
1347	Nearby	1.0607	-0.161151
1348	Nearby	1.0086	-0.154902
1349	Nearby	1.01284	-0.154902
1350	Nearby	1.01284	-0.154902
1351	Nearby	1.01284	-0.154902
1352	Nearby	1.02119	-0.154902
1353	Nearby	1.02119	-0.154902
1354	Nearby	1.02119	-0.154902
1355	Nearby	1.02531	-0.154902
1356	Nearby	1.02531	-0.154902
1357	Nearby	1.02938	-0.154902
1358	Nearby	1.02938	-0.154902
1359	Nearby	1.02938	-0.154902
1360	Nearby	1.02938	-0.154902
1361	Nearby	1.03342	-0.154902
1362	Nearby	1.03342	-0.154902
1363	Nearby	1.03342	-0.154902
1364	Nearby	1.03342	-0.154902
1365	Nearby	1.03342	-0.154902
1366	Nearby	1.03342	-0.154902
1367	Nearby	1.03342	-0.154902
1368	Nearby	1.03342	-0.154902
1369	Nearby	1.03342	-0.154902
1370	Nearby	1.03743	-0.154902
1371	Nearby	1.03743	-0.154902
1372	Nearby	1.03743	-0.154902
1373	Nearby	1.03743	-0.154902
1374	Nearby	1.03743	-0.154902
1375	Nearby	1.04139	-0.154902
1376	Nearby	1.04532	-0.154902
1377	Nearby	1.0086	-0.148742
1378	Nearby	1.01703	-0.148742
1379	Nearby	1.01703	-0.148742
1380	Nearby	1.01703	-0.148742
1381	Nearby	1.01703	-0.148742
1382	Nearby	1.02119	-0.148742
1383	Nearby	1.02938	-0.148742
1384	Nearby	1.02938	-0.148742
1385	Nearby	1.02938	-0.148742
1386	Nearby	1.02938	-0.148742
1387	Nearby	1.02938	-0.148742
1388	Nearby	1.04532	-0.148742
1389	Nearby	1.05308	-0.148742
1390	Nearby	1.06446	-0.148742
1391	Nearby	1.02938	-0.142668
1392	Nearby	1.04922	-0.142668
1393	Nearby	1.04922	-0.142668
1394	Nearby	1.05308	-0.142668
1395	Nearby	1.0569	-0.142668
1396	Nearby	1.02119	-0.136677
1397	Nearby	1.02119	-0.136677
1398	Nearby	1.03342	-0.136677
1399	Nearby	1.03743	-0.136677
1400	Nearby	1.04922	-0.136677
1401	Nearby	1.04922	-0.136677
1402	Nearby	1.04922	-0.136677
1403	Nearby	1.05308	-0.136677
1404	Nearby	1.05308	-0.136677
1405	Nearby	1.05308	-0.136677
1406	Nearby	1.02531	-0.130768
1407	Nearby	1.02531	-0.130768
1408	Nearby	1.03743	-0.130768
1409	Nearby	1.04922	-0.130768
1410	Nearby	1.04922	-0.130768
1411	Nearby	1.05308	-0.130768
1412	Nearby	1.05308	-0.130768
1413	Nearby	1.0086	-0.124939
1414	Nearby	1.0086	-0.124939
1415	Nearby	1.03342	-0.124939
1416	Nearby	1.03342	-0.124939
1417	Nearby	1.03342	-0.124939
1418	Nearby	1.03342	-0.124939
1419	Nearby	1.03743	-0.124939
1420	Nearby	1.04139	-0.124939
1421	Nearby	1.04532	-0.124939
1422	Nearby	1.04532	-0.124939
1423	Nearby	1.0607	-0.124939
1424	Nearby	1.06819	-0.124939
1425	Nearby	1.06819	-0.124939
1426	Nearby	1.06819	-0.124939
1427	Nearby	1.06819	-0.124939
1428	Nearby	1.01703	-0.119186
1429	Nearby	1.02938	-0.119186
1430	Nearby	1.03743	-0.119186
1431	Nearby	1.04922	-0.119186
1432	Nearby	1.03342	-0.113509
1433	Nearby	1.03743	-0.113509
1434	Nearby	1.04139	-0.113509
1435	Nearby	1.04532	-0.113509
1436	Nearby	1.04532	-0.113509
1437	Nearby	1.04922	-0.113509
1438	Nearby	1.04922	-0.113509
1439	Nearby	1.06446	-0.113509
1440	Nearby	1.06446	-0.113509
1441	Nearby	1.07918	-0.113509
1442	Nearby	1.07918	-0.113509
1443	Nearby	1.02938	-0.107905
1444	Nearby	1.03342	-0.107905
1445	Nearby	1.03342	-0.107905
1446	Nearby	1.03342	-0.107905
1447	Nearby	1.03743	-0.107905
1448	Nearby	1.03743	-0.107905
1449	Nearby	1.04922	-0.107905
1450	Nearby	1.0569	-0.107905
1451	Nearby	1.0569	-0.107905
1452	Nearby	1.07555	-0.107905
1453	Nearby	1.07918	-0.107905
1454	Nearby	1.08636	-0.107905
1455	Nearby	1.04139	-0.102373
1456	Nearby	1.04139	-0.102373
1457	Nearby	1.04922	-0.102373
1458	Nearby	1.00432	-0.09691
1459	Nearby	1.03743	-0.09691
1460	Nearby	1.04532	-0.09691
1461	Nearby	1.0569	-0.09691
1462	Nearby	1.06446	-0.09691
1463	Nearby	1.06446	-0.09691
1464	Nearby	1.02531	-0.091515
1465	Nearby	1.04139	-0.091515
1466	Nearby	1.05308	-0.091515
1467	Nearby	1.04922	-0.0861861
1468	Nearby	1.05308	-0.0861861
1469	Nearby	1.03342	-0.0809219
1470	Nearby	1.03342	-0.0809219
1471	Nearby	1.03342	-0.0809219
1472	Nearby	1.03342	-0.0809219
1473	Nearby	1.03743	-0.0809219
1474	Nearby	1.04139	-0.0809219
1475	Nearby	1.04139	-0.0809219
1476	Nearby	1.04532	-0.0809219
1477	Nearby	1.04532	-0.0809219
1478	Nearby	1.04532	-0.0809219
1479	Nearby	1.04532	-0.0809219
1480	Nearby	1.04532	-0.0809219
1481	Nearby	1.04922	-0.0809219
1482	Nearby	1.04922	-0.0809219
1483	Nearby	1.04922	-0.0809219
1484	Nearby	1.04922	-0.0809219
1485	Nearby	1.07188	-0.0809219
1486	Nearby	1.07188	-0.0809219
1487	Nearby	1.04532	-0.0757207
1488	Nearby	1.04922	-0.0757207
1489	Nearby	1.05308	-0.0757207
1490	Nearby	1.06819	-0.0757207
1491	Nearby	1.04139	-0.0705811
1492	Nearby	1.04922	-0.0705811
1493	Nearby	1.0607	-0.0705811
1494	Nearby	1.0607	-0.0705811
1495	Nearby	1.0607	-0.0705811
1496	Nearby	1.06446	-0.0705811
1497	Nearby	1.07918	-0.0705811
1498	Nearby	1.03743	-0.0655015
1499	Nearby	1.04922	-0.0655015
1500	Nearby	1.05308	-0.0655015
1501	Nearby	1.05308	-0.0655015
1502	Nearby	1.05308	-0.0655015
1503	Nearby	1.05308	-0.0655015
1504	Nearby	1.0569	-0.0655015
1505	Nearby	1.06446	-0.0655015
1506	Nearby	1.06446	-0.0655015
1507	Nearby	1.06446	-0.0655015
1508	Nearby	1.07918	-0.0655015
1509	Nearby	1.07918	-0.0655015
1510	Nearby	1.04532	-0.0604807
1511	Nearby	1.0569	-0.0604807
1512	Nearby	1.0569	-0.0604807
1513	Nearby	1.0569	-0.0604807
1514	Nearby	1.05308	-0.0555173
1515	Nearby	1.0607	-0.0555173
1516	Nearby	1.0607	-0.0555173
1517	Nearby	1.06446	-0.0555173
1518	Nearby	1.09691	-0.0555173
1519	Nearby	1.09342	-0.05061
1520	Nearby	1.04532	-0.0457575
1521	Nearby	1.04532	-0.0457575
1522	Nearby	1.04532	-0.0457575
1523	Nearby	1.04532	-0.0457575
1524	Nearby	1.0569	-0.0457575
1525	Nearby	1.0569	-0.0457575
1526	Nearby	1.0607	-0.0457575
1527	Nearby	1.0607	-0.0457575
1528	Nearby	1.06446	-0.0457575
1529	Nearby	1.06819	-0.0457575
1530	Nearby	1.07188	-0.0457575
1531	Nearby	1.07188	-0.0457575
1532	Nearby	1.07188	-0.0457575
1533	Nearby	1.08279	-0.0457575
1534	Nearby	1.08279	-0.0457575
1535	Nearby	1.08279	-0.0457575
1536	Nearby	1.08279	-0.0457575
1537	Nearby	1.0086	-0.0409586
1538	Nearby	1.03342	-0.0409586
1539	Nearby	1.03342	-0.0409586
1540	Nearby	1.03342	-0.0409586
1541	Nearby	1.03342	-0.0409586
1542	Nearby	1.03743	-0.0409586
1543	Nearby	1.06819	-0.0409586
1544	Nearby	1.07188	-0.0409586
1545	Nearby	1.07918	-0.0409586
1546	Nearby	1.07918	-0.0409586
1547	Nearby	1.08636	-0.0409586
1548	Nearby	1.04922	-0.0362122
1549	Nearby	1.04922	-0.0362122
1550	Nearby	1.04922	-0.0362122
1551	Nearby	1.04922	-0.0362122
1552	Nearby	1.06446	-0.0362122
1553	Nearby	1.06819	-0.0362122
1554	Nearby	1.07188	-0.0362122
1555	Nearby	1.07188	-0.0362122
1556	Nearby	1.07188	-0.0362122
1557	Nearby	1.0607	-0.0315171
1558	Nearby	1.0607	-0.0315171
1559	Nearby	1.07188	-0.0315171
1560	Nearby	1.07188	-0.0315171
1561	Nearby	1.07555	-0.0315171
1562	Nearby	1.08991	-0.0315171
1563	Nearby	1.08991	-0.0315171
1564	Nearby	1.09342	-0.0315171
1565	Nearby	1.06819	-0.0268721
1566	Nearby	1.06819	-0.0268721
1567	Nearby	1.07918	-0.0268721
1568	Nearby	1.07918	-0.0268721
1569	Nearby	1.07918	-0.0268721
1570	Nearby	1.07918	-0.0268721
1571	Nearby	1.06446	-0.0222764
1572	Nearby	1.07188	-0.0222764
1573	Nearby	1.07188	-0.0222764
1574	Nearby	1.07188	-0.0222764
1575	Nearby	1.07188	-0.0222764
1576	Nearby	1.07188	-0.0222764
1577	Nearby	1.07555	-0.0222764
1578	Nearby	1.10037	-0.0222764
1579	Nearby	1.10037	-0.0222764
1580	Nearby	1.10037	-0.0222764
1581	Nearby	1.10037	-0.0222764
1582	Nearby	1.0607	-0.0177288
1583	Nearby	1.07188	-0.0177288
1584	Nearby	1.07188	-0.0177288
1585	Nearby	1.07188	-0.0177288
1586	Nearby	1.07918	-0.0177288
1587	Nearby	1.08636	-0.0177288
1588	Nearby	1.08636	-0.0177288
1589	Nearby	1.11727	-0.0177288
1590	Nearby	1.04532	-0.0132283
1591	Nearby	1.04922	-0.0132283
1592	Nearby	1.05308	-0.0132283
1593	Nearby	1.05308	-0.0132283
1594	Nearby	1.05308	-0.0132283
1595	Nearby	1.05308	-0.0132283
1596	Nearby	1.0607	-0.0132283
1597	Nearby	1.0607	-0.0132283
1598	Nearby	1.06446	-0.0132283
1599	Nearby	1.06819	-0.0132283
1600	Nearby	1.07188	-0.0132283
1601	Nearby	1.07188	-0.0132283
1602	Nearby	1.07188	-0.0132283
1603	Nearby	1.07188	-0.0132283
1604	Nearby	1.07555	-0.0132283
1605	Nearby	1.1038	-0.0132283
1606	Nearby	1.05308	-0.00877392
1607	Nearby	1.0607	-0.00877392
1608	Nearby	1.07188	-0.00877392
1609	Nearby	1.07555	-0.00877392
1610	Nearby	1.07918	-0.00877392
1611	Nearby	1.07918	-0.00877392
1612	Nearby	1.07918	-0.00877392
1613	Nearby	1.08279	-0.00877392
1614	Nearby	1.04532	-0.00436481
1615	Nearby	1.05308	-0.00436481
1616	Nearby	1.08279	-0.00436481
1617	Nearby	1.09342	-0.00436481
1618	Nearby	1.09342	-0.00436481
1619	Nearby	1.10037	-0.00436481
1620	Nearby	1.10037	-0.00436481
1621	Nearby	1.1038	-0.00436481
1622	Nearby	1.1038	-0.00436481
1623	Nearby	1.0607	0
1624	Nearby	1.06446	0
1625	Nearby	1.06446	0
1626	Nearby	1.07188	0
1627	Nearby	1.10721	0
1628	Nearby	1.10721	0
1629	Nearby	1.10721	0
1630	Nearby	1.10721	0
1631	Nearby	1.0607	0.00432137
1632	Nearby	1.06446	0.00432137
1633	Nearby	1.06446	0.00432137
1634	Nearby	1.06446	0.00432137
1635	Nearby	1.07188	0.00432137
1636	Nearby	1.07555	0.00432137
1637	Nearby	1.09342	0.00432137
1638	Nearby	1.0569	0.00860017
1639	Nearby	1.07555	0.00860017
1640	Nearby	1.08636	0.00860017
1641	Nearby	1.08636	0.00860017
1642	Nearby	1.08636	0.00860017
1643	Nearby	1.08991	0.00860017
1644	Nearby	1.06819	0.0128372
1645	Nearby	1.07918	0.0128372
1646	Nearby	1.07918	0.0128372
1647	Nearby	1.07918	0.0128372
1648	Nearby	1.07918	0.0128372
1649	Nearby	1.08279	0.0128372
1650	Nearby	1.08279	0.0128372
1651	Nearby	1.08279	0.0128372
1652	Nearby	1.08279	0.0128372
1653	Nearby	1.10037	0.0128372
1654	Nearby	1.06819	0.0170333
1655	Nearby	1.07555	0.0170333
1656	Nearby	1.07918	0.0170333
1657	Nearby	1.0569	0.0211893
1658	Nearby	1.07188	0.0211893
1659	Nearby	1.07188	0.0211893
1660	Nearby	1.08991	0.0211893
1661	Nearby	1.08991	0.0253059
1662	Nearby	1.09342	0.0253059
1663	Nearby	1.09691	0.0253059
1664	Nearby	1.09691	0.0253059
1665	Nearby	1.09691	0.0253059
1666	Nearby	1.09691	0.0253059
1667	Nearby	1.07188	0.0293838
1668	Nearby	1.09342	0.0293838
1669	Nearby	1.10037	0.0293838
1670	Nearby	1.08636	0.0334238
1671	Nearby	1.08991	0.0334238
1672	Nearby	1.09342	0.0334238
1673	Nearby	1.12385	0.0334238
1674	Nearby	1.12385	0.0334238
1675	Nearby	1.12385	0.0334238
1676	Nearby	1.12385	0.0334238
1677	Nearby	1.0607	0.0374265
1678	Nearby	1.10037	0.0374265
1679	Nearby	1.10037	0.0374265
1680	Nearby	1.08279	0.0413927
1681	Nearby	1.08991	0.0413927
1682	Nearby	1.08991	0.0413927
1683	Nearby	1.09342	0.0413927
1684	Nearby	1.07555	0.045323
1685	Nearby	1.07555	0.045323
1686	Nearby	1.07555	0.045323
1687	Nearby	1.07555	0.045323
1688	Nearby	1.07918	0.045323
1689	Nearby	1.08991	0.045323
1690	Nearby	1.08991	0.045323
1691	Nearby	1.10721	0.045323
1692	Nearby	1.08279	0.049218
1693	Nearby	1.09691	0.049218
1694	Nearby	1.09691	0.049218
1695	Nearby	1.09691	0.049218
1696	Nearby	1.09691	0.049218
1697	Nearby	1.09691	0.049218
1698	Nearby	1.09691	0.049218
1699	Nearby	1.1038	0.049218
1700	Nearby	1.1038	0.049218
1701	Nearby	1.1038	0.049218
1702	Nearby	1.1038	0.049218
1703	Nearby	1.1038	0.049218
1704	Nearby	1.10721	0.049218
1705	Nearby	1.10721	0.049218
1706	Nearby	1.10721	0.049218
1707	Nearby	1.10721	0.049218
1708	Nearby	1.10721	0.049218
1709	Nearby	1.11059	0.049218
1710	Nearby	1.11059	0.049218
1711	Nearby	1.11059	0.049218
1712	Nearby	1.11059	0.049218
1713	Nearby	1.08991	0.0530784
1714	Nearby	1.08991	0.0530784
1715	Nearby	1.08991	0.0530784
1716	Nearby	1.08991	0.0530784
1717	Nearby	1.10037	0.0530784
1718	Nearby	1.10037	0.0530784
1719	Nearby	1.09342	0.0569049
1720	Nearby	1.06819	0.0606978
1721	Nearby	1.09342	0.0606978
1722	Nearby	1.10037	0.0606978
1723	Nearby	1.10037	0.0606978
1724	Nearby	1.1038	0.0606978
1725	Nearby	1.07918	0.064458
1726	Nearby	1.09342	0.064458
1727	Nearby	1.09342	0.064458
1728	Nearby	1.09691	0.064458
1729	Nearby	1.10037	0.064458
1730	Nearby	1.10037	0.064458
1731	Nearby	1.10037	0.064458
1732	Nearby	1.10037	0.064458
1733	Nearby	1.1038	0.064458
1734	Nearby	1.07918	0.0681859
1735	Nearby	1.10037	0.0681859
1736	Nearby	1.10721	0.0681859
1737	Nearby	1.10721	0.0681859
1738	Nearby	1.10721	0.0681859
1739	Nearby	1.10721	0.0681859
1740	Nearby	1.10721	0.0681859
1741	Nearby	1.10037	0.071882
1742	Nearby	1.10037	0.071882
1743	Nearby	1.10721	0.071882
1744	Nearby	1.11059	0.071882
1745	Nearby	1.11059	0.071882
1746	Nearby	1.09342	0.075547
1747	Nearby	1.09342	0.0791812
1748	Nearby	1.09342	0.0791812
1749	Nearby	1.09691	0.0791812
1750	Nearby	1.09691	0.0791812
1751	Nearby	1.08279	0.0827854
1752	Nearby	1.10037	0.0827854
1753	Nearby	1.10037	0.0827854
1754	Nearby	1.09342	0.0863598
1755	Nearby	1.09691	0.0863598
1756	Nearby	1.09691	0.0863598
1757	Nearby	1.11394	0.0863598
1758	Nearby	1.10037	0.0899051
1759	Nearby	1.08991	0.09691
1760	Nearby	1.09691	0.09691
1761	Nearby	1.10721	0.09691
1762	Nearby	1.10721	0.09691
1763	Nearby	1.07555	0.100371
1764	Nearby	1.10721	0.100371
1765	Nearby	1.10721	0.100371
1766	Nearby	1.11059	0.100371
1767	Nearby	1.11059	0.100371
1768	Nearby	1.11727	0.100371
1769	Nearby	1.11727	0.100371
1770	Nearby	1.09691	0.103804
1771	Nearby	1.09691	0.103804
1772	Nearby	1.09691	0.103804
1773	Nearby	1.09691	0.103804
1774	Nearby	1.09691	0.103804
1775	Nearby	1.09691	0.103804
1776	Nearby	1.09691	0.103804
1777	Nearby	1.1271	0.103804
1778	Nearby	1.1038	0.10721
1779	Nearby	1.11727	0.10721
1780	Nearby	1.11727	0.10721
1781	Nearby	1.11727	0.10721
1782	Nearby	1.08636	0.11059
1783	Nearby	1.10721	0.11059
1784	Nearby	1.11727	0.113943
1785	Nearby	1.11727	0.113943
1786	Nearby	1.11727	0.113943
1787	Nearby	1.11727	0.113943
1788	Nearby	1.11727	0.113943
1789	Nearby	1.11727	0.113943
1790	Nearby	1.11727	0.113943
1791	Nearby	1.11727	0.113943
1792	Nearby	1.12057	0.113943
1793	Nearby	1.13672	0.113943
1794	Nearby	1.13672	0.113943
1795	Nearby	1.12385	0.117271
1796	Nearby	1.09691	0.120574
1797	Nearby	1.11394	0.120574
1798	Nearby	1.11727	0.120574
1799	Nearby	1.12057	0.120574
1800	Nearby	1.12057	0.120574
1801	Nearby	1.1038	0.123852
1802	Nearby	1.11059	0.123852
1803	Nearby	1.10037	0.127105
1804	Nearby	1.12057	0.130334
1805	Nearby	1.12385	0.130334
1806	Nearby	1.15836	0.130334
1807	Nearby	1.11394	0.133539
1808	Nearby	1.11394	0.133539
1809	Nearby	1.11394	0.133539
1810	Nearby	1.11394	0.133539
1811	Nearby	1.11727	0.133539
1812	Nearby	1.13354	0.133539
1813	Nearby	1.1038	0.136721
1814	Nearby	1.1038	0.136721
1815	Nearby	1.1038	0.136721
1816	Nearby	1.1038	0.136721
1817	Nearby	1.1038	0.136721
1818	Nearby	1.12385	0.136721
1819	Nearby	1.13672	0.136721
1820	Nearby	1.13672	0.136721
1821	Nearby	1.13988	0.136721
1822	Nearby	1.14613	0.139879
1823	Nearby	1.14613	0.139879
1824	Nearby	1.14922	0.139879
1825	Nearby	1.14922	0.139879
1826	Nearby	1.11059	0.143015
1827	Nearby	1.13033	0.143015
1828	Nearby	1.14922	0.143015
1829	Nearby	1.15229	0.143015
1830	Nearby	1.1038	0.146128
1831	Nearby	1.1038	0.146128
1832	Nearby	1.1038	0.146128
1833	Nearby	1.1271	0.146128
1834	Nearby	1.13033	0.146128
1835	Nearby	1.13988	0.146128
1836	Nearby	1.13988	0.146128
1837	Nearby	1.13988	0.146128
1838	Nearby	1.13988	0.146128
1839	Nearby	1.14301	0.146128
1840	Nearby	1.14922	0.146128
1841	Nearby	1.15534	0.146128
1842	Nearby	1.15534	0.146128
1843	Nearby	1.15534	0.146128
1844	Nearby	1.15534	0.146128
1845	Nearby	1.12385	0.149219
1846	Nearby	1.11727	0.152288
1847	Nearby	1.12385	0.152288
1848	Nearby	1.11727	0.155336
1849	Nearby	1.08636	0.158362
1850	Nearby	1.08991	0.158362
1851	Nearby	1.08991	0.158362
1852	Nearby	1.10037	0.158362
1853	Nearby	1.1271	0.158362
1854	Nearby	1.1271	0.158362
1855	Nearby	1.14613	0.158362
1856	Nearby	1.14613	0.158362
1857	Nearby	1.14613	0.158362
1858	Nearby	1.14613	0.158362
1859	Nearby	1.15229	0.158362
1860	Nearby	1.1038	0.161368
1861	Nearby	1.12385	0.161368
1862	Nearby	1.1271	0.161368
1863	Nearby	1.1271	0.161368
1864	Nearby	1.13988	0.161368
1865	Nearby	1.13988	0.161368
1866	Nearby	1.14922	0.161368
1867	Nearby	1.14922	0.161368
1868	Nearby	1.11394	0.167317
1869	Nearby	1.12057	0.167317
1870	Nearby	1.12385	0.170262
1871	Nearby	1.12385	0.170262
1872	Nearby	1.1271	0.170262
1873	Nearby	1.14301	0.173186
1874	Nearby	1.14301	0.173186
1875	Nearby	1.12057	0.176091
1876	Nearby	1.13354	0.176091
1877	Nearby	1.11727	0.178977
1878	Nearby	1.1271	0.181844
1879	Nearby	1.1271	0.181844
1880	Nearby	1.13672	0.181844
1881	Nearby	1.13672	0.181844
1882	Nearby	1.13988	0.181844
1883	Nearby	1.15534	0.181844
1884	Nearby	1.16435	0.181844
1885	Nearby	1.16435	0.181844
1886	Nearby	1.12057	0.184691
1887	Nearby	1.13033	0.184691
1888	Nearby	1.14922	0.184691
1889	Nearby	1.15229	0.184691
1890	Nearby	1.16435	0.184691
1891	Nearby	1.12385	0.187521
1892	Nearby	1.13988	0.187521
1893	Nearby	1.14301	0.187521
1894	Nearby	1.13033	0.193125
1895	Nearby	1.13033	0.193125
1896	Nearby	1.13354	0.193125
1897	Nearby	1.13988	0.193125
1898	Nearby	1.11394	0.1959
1899	Nearby	1.12057	0.1959
1900	Nearby	1.14301	0.198657
1901	Nearby	1.15229	0.198657
1902	Nearby	1.12057	0.201397
1903	Nearby	1.13033	0.201397
1904	Nearby	1.14613	0.201397
1905	Nearby	1.15534	0.201397
1906	Nearby	1.17319	0.201397
1907	Nearby	1.12057	0.20412
1908	Nearby	1.14301	0.20412
1909	Nearby	1.10721	0.206826
1910	Nearby	1.16732	0.206826
1911	Nearby	1.13988	0.209515
1912	Nearby	1.14301	0.209515
1913	Nearby	1.15534	0.209515
1914	Nearby	1.11727	0.214844
1915	Nearby	1.11727	0.214844
1916	Nearby	1.11727	0.214844
1917	Nearby	1.11727	0.214844
1918	Nearby	1.13354	0.214844
1919	Nearby	1.16732	0.214844
1920	Nearby	1.16732	0.214844
1921	Nearby	1.16732	0.214844
1922	Nearby	1.16732	0.214844
1923	Nearby	1.13672	0.220108
1924	Nearby	1.14301	0.220108
1925	Nearby	1.15836	0.220108
1926	Nearby	1.15836	0.220108
1927	Nearby	1.15836	0.220108
1928	Nearby	1.15836	0.220108
1929	Nearby	1.14613	0.222716
1930	Nearby	1.14613	0.222716
1931	Nearby	1.14613	0.222716
1932	Nearby	1.14613	0.222716
1933	Nearby	1.14613	0.222716
1934	Nearby	1.14613	0.222716
1935	Nearby	1.14922	0.222716
1936	Nearby	1.15534	0.222716
1937	Nearby	1.14613	0.225309
1938	Nearby	1.14613	0.225309
1939	Nearby	1.16732	0.225309
1940	Nearby	1.15836	0.227887
1941	Nearby	1.14301	0.230449
1942	Nearby	1.14613	0.230449
1943	Nearby	1.15836	0.230449
1944	Nearby	1.14613	0.235528
1945	Nearby	1.15534	0.235528
1946	Nearby	1.16137	0.235528
1947	Nearby	1.17026	0.235528
1948	Nearby	1.15534	0.238046
1949	Nearby	1.15836	0.238046
1950	Nearby	1.14301	0.240549
1951	Nearby	1.14301	0.240549
1952	Nearby	1.16435	0.240549
1953	Nearby	1.15534	0.243038
1954	Nearby	1.17026	0.243038
1955	Nearby	1.17026	0.243038
1956	Nearby	1.17319	0.243038
1957	Nearby	1.12385	0.245513
1958	Nearby	1.15534	0.245513
1959	Nearby	1.15534	0.245513
1960	Nearby	1.16732	0.245513
1961	Nearby	1.16732	0.245513
1962	Nearby	1.16732	0.245513
1963	Nearby	1.16732	0.245513
1964	Nearby	1.15229	0.25042
1965	Nearby	1.15229	0.25042
1966	Nearby	1.15229	0.25042
1967	Nearby	1.16137	0.25042
1968	Nearby	1.16435	0.25042
1969	Nearby	1.16732	0.25042
1970	Nearby	1.16435	0.255273
1971	Nearby	1.17319	0.257679
1972	Nearby	1.17319	0.257679
1973	Nearby	1.13988	0.260071
1974	Nearby	1.13988	0.260071
1975	Nearby	1.13988	0.260071
1976	Nearby	1.13988	0.260071
1977	Nearby	1.15534	0.262451
1978	Nearby	1.16732	0.262451
1979	Nearby	1.17026	0.262451
1980	Nearby	1.17026	0.262451
1981	Nearby	1.17026	0.262451
1982	Nearby	1.17026	0.262451
1983	Nearby	1.16435	0.267172
1984	Nearby	1.13988	0.269513
1985	Nearby	1.14922	0.269513
1986	Nearby	1.15229	0.269513
1987	Nearby	1.16732	0.269513
1988	Nearby	1.16732	0.269513
1989	Nearby	1.16732	0.269513
1990	Nearby	1.16732	0.269513
1991	Nearby	1.16732	0.269513
1992	Nearby	1.16732	0.269513
1993	Nearby	1.16435	0.271842
1994	Nearby	1.15534	0.274158
1995	Nearby	1.16137	0.278754
1996	Nearby	1.16435	0.290035
[truncated: 115 more rows]

## Sheet: ANCOVA results
Penaeus aztecus
Homogeneity of slopes (parallelism test)
Univariate Tests of Significance for Log W azt
Effective hypothesis decomposition
	SS	Degr. of	MS	F	p
		Freedom
Intercept	106.823	1	106.823	25694.2	0
Site azt	0.004	1	0.004	0.95	0.329225
Log CL azt	100.042	1	100.042	24063.2	0
Site azt*Log CL azt	0.0084	1	0.0084	2.02	0.155043
Error	8.7598	2107	0.0042
Penaeus aztecus
ANCOVA results
Univariate Tests of Significance for Log W azt
Effective hypothesis decomposition
	SS	Degr. of	MS	F	p
		Freedom
Intercept	116.79	1	116.79	28078.1	0
Log CL azt	109.088	1	109.088	26226.4	0
Site azt	0.1617	1	0.1617	38.87	0
Error	8.7682	2108	0.0042
Penaeus duorarum
Homogeneity of slopes (parallelism test)
Univariate Tests of Significance for Log W duo
Effective hypothesis decomposition
	SS	Degr. of	MS	F	p
		Freedom
Intercept	49.6543	1	49.6543	10808.8	0
Site duo	0.00198	1	0.00198	0.43	0.512054
Log CL duo	45.4992	1	45.4992	9904.29	0
Site duo*Log CL duo	0.0039	1	0.0039	0.85	0.357238
Error	4.31826	940	0.00459
Penaeus duorarum
ANCOVA results
Univariate Tests of Significance for Log W duo
Effective hypothesis decomposition
	SS	Degr. of	MS	F	p
		Freedom
Intercept	61.121	1	61.121	13307	0
Log CL duo	56.1195	1	56.1195	12218.1	0
Site duo	0.05176	1	0.05176	11.27	0.00082
Error	4.32216	941	0.00459

## Sheet: Predicted mean weight
Predicted mean weight (g) calculated from ANCOVA
Penaeus aztecus
LS Means
(Computed for user-defined covariate values: CL= 11 mm)
Seagrass bed	Log W	Log W	N		W (g)	Std.Err. (g)
	Mean	Std.Err.
Distant	-0.10537	0.002465	685		0.784567	0.00446576
Nearby	-0.124105	0.001714	1426		0.751441	0.00297152
Predicted mean weight (g) calculated from ANCOVA
Penaeus duorarum
LS Means
(Computed for user-defined covariate values: CL= 11 mm)
Seagrass bed	Log W	Log W	N		W (g)	Std.Err. (g)
	Mean	Std.Err.
Distant	-0.102792	0.004236	258		0.789238	0.0077357
Nearby	-0.119409	0.002606	686		0.759611	0.00457177
