# Supplementary material for: Density-dependent condition of juvenile penaeid shrimps in seagrass-dominated aquatic vegetation beds located at different distance from a tidal inlet
Source: PeerJ. 2020 Dec 8;8:e10496. doi: 10.7717/peerj.10496 (PMC7731651; doi:10.7717/peerj.10496)
Supplement: Supplemental Information 4 — Shrimp predicted weight (g) at a carapace length (CL) of 11 mm. Estimates from the L-W relationship by species and month within each seagrass bed. [file peerj-08-10496-s004.xlsx]

## Sheet: Predicted weight using L-W
Predicted weight (g) of shrimp at a length of 11 mm CL. Estimates from the L-W relationship by species and month within each seagrass bed
			Penaeus aztecus (condition)	Number of shrimp utilized in fitting the L-W relationship, and
		Total abundance	Predicted weight (g) at a length of 11 mm CL	subsequent estimation of weigth (g) at a length of 11 mm CL
Seagrass bed	Month (2005)	of shrimp (ind./100 m2)	obtained from the L-W relationship	(n)
Distant	January	73.6667	0.879691	102
Distant	February	97	0.805535	110
Distant	March	47.3333	0.87058	80
Distant	April	24	0.823434	39
Distant	November	54.3333	0.782536	109
Distant	December	35	0.81382	49
Nearby	January	86.3333	0.857416	121
Nearby	February	211.333	0.755564	156
Nearby	March	188	0.793372	88
Nearby	April	189.333	0.753673	314
Nearby	November	228	0.719033	342
Nearby	December	118.333	0.743035	174
			Penaeus duorarum (condition)	Number of shrimp utilized in fitting the L-W relationship, and
		Total abundance	Predicted weight (g) at a length of 11 mm CL	subsequent estimation of weigth (g) at a length of 11 mm CL
Seagrass bed	Month (2005)	of shrimp (ind./100 m2)	obtained from the L-W relationship	(n)
Distant	January	73.6667	0.86983	21
Distant	February	97	0.793697	143
Distant	March	47.3333	0.872063	49
Distant	April	24	0.801946	21
Nearby	January	86.3333	0.818828	48
Nearby	February	211.333	0.779158	252
Nearby	March	188	0.776664	49
Nearby	April	189.333	0.753159	100
Nearby	November	228	0.698929	68
Nearby	December	118.333	0.759969	41
Months with reduced abundance of any of the species were excluded from the analysis
CL: carapace length
L-W: length-weight
Monthly data of total abundance of shrimp correspond to average values.

## Sheet: Correlations algae & salinity
Correlations of maroalgal biomass and salinity vs. shrimp abundance and body condition
													Correlation coefficients (r) and corresponding p-values (p>0.05 in all cases)
			Penaeus aztecus (condition)	Penaeus duorarum (condition)									N=12	N= 12	N=10	N= 12	N=10
		Total abundance	Predicted weight (g) at a length of 11 mm CL	Predicted weight (g) at a length of 11 mm CL	Macroalgae	Salinity	Penaeus aztecus	Penaeus duorarum					Total abundance of shrimp	Penaeus aztecus (condition)	Penaeus duorarum (condition)	Penaeus aztecus	Penaeus duorarum
Seagrass bed	Month (2005)	of shrimp (ind./100 m2)	obtained from the L-W relationship	obtained from the L-W relationship	biomass (g/m2 ww)		abundance (ind./100 m2)	abundance (ind./100 m2)					(ind./100 m2)	Predicted weight (g) at a length of 11 mm CL	Predicted weight (g) at a length of 11 mm CL	abundance (ind./100 m2)	abundance (ind./100 m2)
Distant	January	73.6667	0.879691	0.86983	36.7917	44.3333	34	7				Macroalgae biomass (g/m2 ww)	r= -0.4983	r= 0.4651	r= 0.3795	r= -0.4079	r= -0.2486
Distant	February	97	0.805535	0.793697	6.14167	44	36.6667	49					p= 0.099	p= 0.128	p= 0.279	p= 0.188	p= 0.489
Distant	March	47.3333	0.87058	0.872063	251.983	39.6667	26.6667	16.3333				Salinity	r= -0.1691	r= 0.4288	r= 0.5769	r= -0.2507	r= -0.2104
Distant	April	24	0.823434	0.801946	261.168	40	13.3333	7.33333					p= 0.599	p= 0.164	p= 0.081	p= 0.432	p= 0.560
Distant	November	54.3333	0.782536		120.925	32	37
Distant	December	35	0.81382		457.075	32	16.3333
Nearby	January	86.3333	0.857416	0.818828	312.542	38.5	42	18.6667
Nearby	February	211.333	0.755564	0.779158	7.89167	38.6667	52	85.3333
Nearby	March	188	0.793372	0.776664	275.45	31	82.3333	54.6667
Nearby	April	189.333	0.753673	0.753159	118.525	39	106.333	34.3333
Nearby	November	228	0.719033	0.698929	5.61667	34.6667	114.667	22.6667
Nearby	December	118.333	0.743035	0.759969	17.0917	36.3333	58.6667	13.6667
Months with reduced abundance of any of the species were excluded from the analysis (blank cells)
CL: carapace length
L-W: length-weight
Monthly data of macroalgal biomass, salinity, and shrimp abundance (total and by species) correspond to average values.
